# Supplementary material for: Genes Participating in the Ensheathment of Neurons Are Affected by Postnatal Stress and Maternal Immune Activation in the Pituitary Gland
Source: MDPI journal article supplement (doi:10.3390/genes14051007), 2023-04-28
Supplement: s1 [file s1]

Supplemental Materials

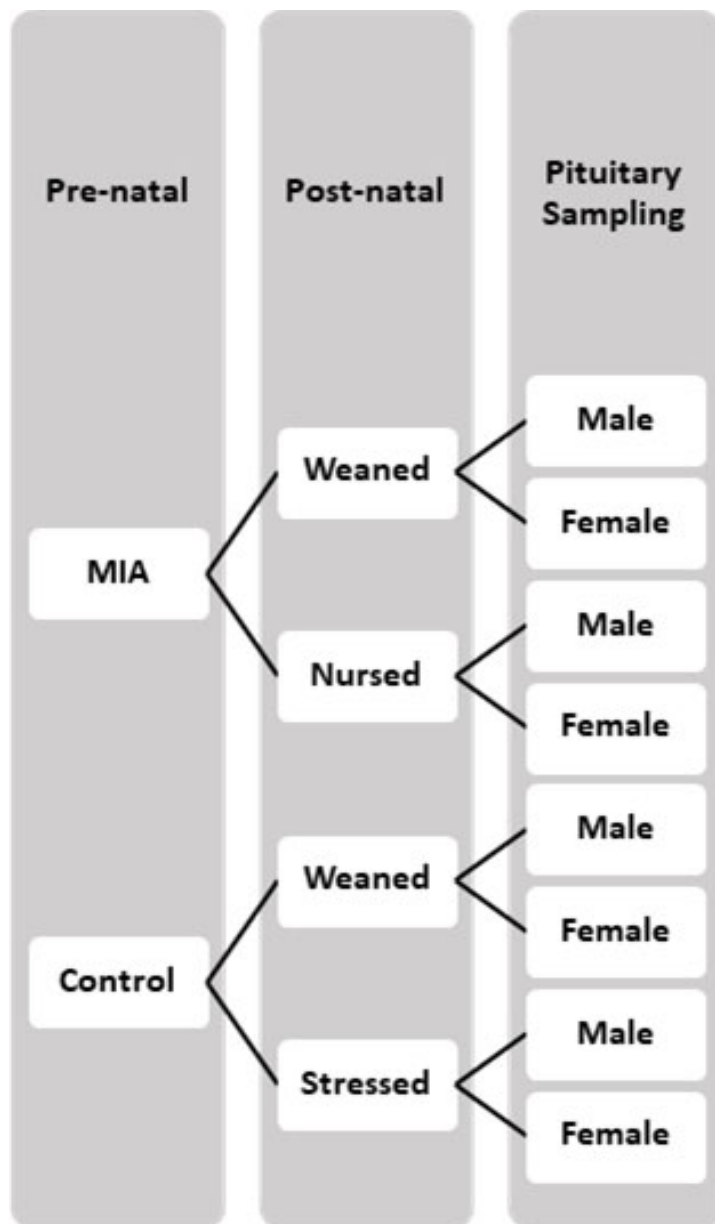

Supplemental Figure S1. Experimental design scheme.

**Supplemental Table S1.** Log<sub>2</sub>(fold change) and False Discovery Rate-adjusted *p*-value (LogFC) and FDR, respectively) of the genes in the pituitary gland with significant (FDR *p*-value < 0.05 and |LogFC| > 2.5) interaction or main effect of maternal immune activation (MIA), weaning, and sex.

| Effect         | Gene Symbol         | LogFC <sup>1</sup> | FDR                  |
|----------------|---------------------|--------------------|----------------------|
| Weaning-by-Sex | <i>Sst</i>          | 6.22               | 5 × 10 <sup>-8</sup> |
| Weaning-by-Sex | <i>Npy</i>          | 5.35               | 4 × 10 <sup>-8</sup> |
| Weaning-by-Sex | <i>Tac1</i>         | 4.76               | 3 × 10 <sup>-8</sup> |
| Weaning-by-Sex | <i>Col11a2</i>      | 4.59               | 1 × 10 <sup>-8</sup> |
| Weaning-by-Sex | <i>Agrp</i>         | 4.66               | 7 × 10 <sup>-8</sup> |
| Weaning-by-Sex | <i>Gabrq</i>        | 4.51               | 8 × 10 <sup>-8</sup> |
| Weaning-by-Sex | <i>Camkv</i>        | 4.4                | 1 × 10 <sup>-8</sup> |
| Weaning-by-Sex | <i>Loc110256816</i> | 4.22               | 1 × 10 <sup>-8</sup> |
| Weaning-by-Sex | <i>Fndc9</i>        | 4.04               | 7 × 10 <sup>-8</sup> |
| Weaning-by-Sex | <i>Loc100511183</i> | 3.86               | 4 × 10 <sup>-8</sup> |
| Weaning-by-Sex | <i>Nptx1</i>        | 3.87               | 4 × 10 <sup>-8</sup> |
| Weaning-by-Sex | <i>Gtsf1</i>        | -3.97              | 2 × 10 <sup>-8</sup> |
| Weaning-by-Sex | <i>Slc6a7</i>       | 3.65               | 1 × 10 <sup>-8</sup> |
| Weaning-by-Sex | <i>Loc100158003</i> | 3.64               | 8 × 10 <sup>-8</sup> |
| Weaning-by-Sex | <i>Gal</i>          | 3.45               | 1 × 10 <sup>-8</sup> |
| Weaning-by-Sex | <i>Comp</i>         | 3.69               | 1 × 10 <sup>-8</sup> |
| Weaning-by-Sex | <i>Cbln4</i>        | 3.64               | 1 × 10 <sup>-8</sup> |
| Weaning-by-Sex | <i>Loc110256043</i> | 3.32               | 1 × 10 <sup>-8</sup> |
| Weaning-by-Sex | <i>Loc102161214</i> | 4.07               | 4 × 10 <sup>-8</sup> |
| Weaning-by-Sex | <i>Atp5pd</i>       | 3.22               | 7 × 10 <sup>-8</sup> |
| Weaning-by-Sex | <i>Slc5a5</i>       | 3.23               | 2 × 10 <sup>-8</sup> |
| Weaning-by-Sex | <i>Odf3b</i>        | 3.36               | 4 × 10 <sup>-8</sup> |
| Weaning-by-Sex | <i>Grin1</i>        | 3.08               | 8 × 10 <sup>-8</sup> |
| Weaning-by-Sex | <i>Cacna2d3</i>     | 3.12               | 9 × 10 <sup>-8</sup> |
| Weaning-by-Sex | <i>Sap25</i>        | 3.06               | 9 × 10 <sup>-8</sup> |
| Weaning-by-Sex | <i>Draxin</i>       | 3.24               | 9 × 10 <sup>-7</sup> |
| Weaning-by-Sex | <i>Gla2</i>         | 3.05               | 2 × 10 <sup>-7</sup> |
| Weaning-by-Sex | <i>Calb2</i>        | 3.04               | 2 × 10 <sup>-7</sup> |
| Weaning-by-Sex | <i>Cpne6</i>        | 3.15               | 3 × 10 <sup>-7</sup> |
| Weaning-by-Sex | <i>Loc100525452</i> | 3.13               | 3 × 10 <sup>-7</sup> |
| Weaning-by-Sex | <i>Ttr</i>          | 3.2                | 3 × 10 <sup>-7</sup> |
| Weaning-by-Sex | <i>Msmg</i>         | -3.20              | 3 × 10 <sup>-7</sup> |
| Weaning-by-Sex | <i>Vsnl1</i>        | 2.9                | 5 × 10 <sup>-7</sup> |
| Weaning-by-Sex | <i>Loc100152209</i> | -2.87              | 6 × 10 <sup>-7</sup> |
| Weaning-by-Sex | <i>Slc22a2</i>      | 2.97               | 6 × 10 <sup>-7</sup> |
| Weaning-by-Sex | <i>Sult1a3</i>      | 2.89               | 6 × 10 <sup>-7</sup> |

|                |                     |       |                    |
|----------------|---------------------|-------|--------------------|
| Weaning-by-Sex | <i>Shisa9</i>       | 2.96  | $7 \times 10^{-7}$ |
| Weaning-by-Sex | <i>Osr1</i>         | 2.9   | $1 \times 10^{-6}$ |
| Weaning-by-Sex | <i>Notum</i>        | 2.85  | $2 \times 10^{-6}$ |
| Weaning-by-Sex | <i>Slc13a4</i>      | 2.69  | $3 \times 10^{-6}$ |
| Weaning-by-Sex | <i>Loc110258721</i> | 2.98  | $4 \times 10^{-6}$ |
| Weaning-by-Sex | <i>Hs6st3</i>       | 2.74  | $5 \times 10^{-6}$ |
| Weaning-by-Sex | <i>Loc110258908</i> | 2.81  | $7 \times 10^{-6}$ |
| Weaning-by-Sex | <i>Cartpt</i>       | 2.61  | $7 \times 10^{-6}$ |
| Weaning-by-Sex | <i>Rn5-8s</i>       | 2.56  | $1 \times 10^{-5}$ |
| Weaning-by-Sex | <i>Npw</i>          | 2.68  | $2 \times 10^{-5}$ |
| Weaning-by-Sex | <i>Hdc</i>          | 2.67  | $2 \times 10^{-5}$ |
| Weaning-by-Sex | <i>C3h16orf89</i>   | 2.56  | $2 \times 10^{-5}$ |
| Weaning-by-Sex | <i>Nxph1</i>        | 2.7   | $2 \times 10^{-5}$ |
| Weaning-by-Sex | <i>Tmem196</i>      | 2.76  | $3 \times 10^{-5}$ |
| Weaning-by-Sex | <i>Gjb2</i>         | 2.69  | $3 \times 10^{-5}$ |
| Weaning-by-Sex | <i>Zic5</i>         | 2.81  | $3 \times 10^{-5}$ |
| Weaning-by-Sex | <i>Eif1ay</i>       | -4.91 | $4 \times 10^{-5}$ |
| Weaning-by-Sex | <i>Ngb</i>          | 2.51  | $5 \times 10^{-5}$ |
| Weaning-by-Sex | <i>Cbln1</i>        | 2.62  | $2 \times 10^{-4}$ |
| Weaning-by-Sex | <i>Loc110259430</i> | -2.67 | $1 \times 10^{-3}$ |
| Weaning-by-Sex | <i>Loc110257903</i> | 3.05  | $3 \times 10^{-3}$ |
| Weaning-by-Sex | <i>Loc110257905</i> | -3.66 | $3 \times 10^{-3}$ |
| Weaning-by-Sex | <i>Loc100624590</i> | -3.45 | $8 \times 10^{-3}$ |
| MIA-by-Weaning | <i>Mobp</i>         | -7.66 | $6 \times 10^{-8}$ |
| MIA-by-Weaning | <i>Mbp</i>          | -7.51 | $8 \times 10^{-8}$ |
| MIA-by-Weaning | <i>Ernm</i>         | -7.11 | $2 \times 10^{-8}$ |
| MIA-by-Weaning | <i>Hapln2</i>       | -7.55 | $2 \times 10^{-8}$ |
| MIA-by-Weaning | <i>Avp</i>          | -6.75 | $3 \times 10^{-8}$ |
| MIA-by-Weaning | <i>Mag</i>          | -6.55 | $3 \times 10^{-8}$ |
| MIA-by-Weaning | <i>Pou3f3</i>       | -6.83 | $3 \times 10^{-8}$ |
| MIA-by-Weaning | <i>Mal</i>          | -6.81 | $1 \times 10^{-8}$ |
| MIA-by-Weaning | <i>Plp1</i>         | -6.32 | $2 \times 10^{-8}$ |
| MIA-by-Weaning | <i>Mog</i>          | -6.36 | $3 \times 10^{-8}$ |
| MIA-by-Weaning | <i>Gjb1</i>         | -6.79 | $2 \times 10^{-8}$ |
| MIA-by-Weaning | <i>Slc14a1</i>      | -6.25 | $4 \times 10^{-8}$ |
| MIA-by-Weaning | <i>Nkx6-2</i>       | -6.23 | $4 \times 10^{-8}$ |
| MIA-by-Weaning | <i>Gjc2</i>         | -6.08 | $5 \times 10^{-8}$ |
| MIA-by-Weaning | <i>Mlc1</i>         | -5.94 | $1 \times 10^{-8}$ |
| MIA-by-Weaning | <i>Grm3</i>         | -6.09 | $2 \times 10^{-8}$ |
| MIA-by-Weaning | <i>Fa2h</i>         | -5.81 | $3 \times 10^{-8}$ |

|                |                     |       |                    |
|----------------|---------------------|-------|--------------------|
| MIA-by-Weaning | <i>Gabrq</i>        | 6.65  | $3 \times 10^{-8}$ |
| MIA-by-Weaning | <i>Ugt8</i>         | -5.52 | $3 \times 10^{-8}$ |
| MIA-by-Weaning | <i>Adamts4</i>      | -5.54 | $7 \times 10^{-8}$ |
| MIA-by-Weaning | <i>Nphs1</i>        | -5.65 | $3 \times 10^{-8}$ |
| MIA-by-Weaning | <i>Ttyh1</i>        | -5.41 | $6 \times 10^{-8}$ |
| MIA-by-Weaning | <i>Tmem88b</i>      | -5.45 | $9 \times 10^{-8}$ |
| MIA-by-Weaning | <i>Cmtm5</i>        | -5.49 | $2 \times 10^{-8}$ |
| MIA-by-Weaning | <i>Fabp7</i>        | -5.28 | $6 \times 10^{-8}$ |
| MIA-by-Weaning | <i>Tf</i>           | -5.19 | $1 \times 10^{-8}$ |
| MIA-by-Weaning | <i>Sox10</i>        | -5.13 | $9 \times 10^{-8}$ |
| MIA-by-Weaning | <i>Loc110256043</i> | 5.2   | $3 \times 10^{-8}$ |
| MIA-by-Weaning | <i>Sgk2</i>         | -5.16 | $4 \times 10^{-8}$ |
| MIA-by-Weaning | <i>Tubb4a</i>       | -4.86 | $7 \times 10^{-8}$ |
| MIA-by-Weaning | <i>Fut2</i>         | -5.02 | $9 \times 10^{-8}$ |
| MIA-by-Weaning | <i>Elfn2</i>        | -4.89 | $1 \times 10^{-8}$ |
| MIA-by-Weaning | <i>Olig1</i>        | -4.72 | $1 \times 10^{-8}$ |
| MIA-by-Weaning | <i>Loc102161214</i> | 5.76  | $2 \times 10^{-8}$ |
| MIA-by-Weaning | <i>Slc17a7</i>      | -4.73 | $3 \times 10^{-8}$ |
| MIA-by-Weaning | <i>Igsf21</i>       | -5.07 | $4 \times 10^{-8}$ |
| MIA-by-Weaning | <i>Opalin</i>       | -4.64 | $5 \times 10^{-8}$ |
| MIA-by-Weaning | <i>Slc5a5</i>       | 4.95  | $9 \times 10^{-8}$ |
| MIA-by-Weaning | <i>Bcan</i>         | -4.6  | $1 \times 10^{-8}$ |
| MIA-by-Weaning | <i>Slc6a1</i>       | -4.61 | $1 \times 10^{-8}$ |
| MIA-by-Weaning | <i>Olig2</i>        | -4.63 | $1 \times 10^{-8}$ |
| MIA-by-Weaning | <i>Plxnb3</i>       | -4.61 | $1 \times 10^{-8}$ |
| MIA-by-Weaning | <i>Slc1a2</i>       | -4.55 | $2 \times 10^{-8}$ |
| MIA-by-Weaning | <i>Synpo2l</i>      | -4.59 | $5 \times 10^{-8}$ |
| MIA-by-Weaning | <i>Sh3tc2</i>       | -4.7  | $5 \times 10^{-8}$ |
| MIA-by-Weaning | <i>Stum</i>         | -4.51 | $7 \times 10^{-8}$ |
| MIA-by-Weaning | <i>Gfap</i>         | -4.44 | $1 \times 10^{-8}$ |
| MIA-by-Weaning | <i>Agrp</i>         | 4.89  | $2 \times 10^{-8}$ |
| MIA-by-Weaning | <i>Dact2</i>        | -4.62 | $2 \times 10^{-8}$ |
| MIA-by-Weaning | <i>Fam131b</i>      | -4.35 | $1 \times 10^{-8}$ |
| MIA-by-Weaning | <i>C14h10orf90</i>  | -4.51 | $1 \times 10^{-8}$ |
| MIA-by-Weaning | <i>Kcrj10</i>       | -4.31 | $1 \times 10^{-8}$ |
| MIA-by-Weaning | <i>Loc110261683</i> | -4.52 | $2 \times 10^{-8}$ |
| MIA-by-Weaning | <i>Atp10b</i>       | -4.35 | $4 \times 10^{-8}$ |
| MIA-by-Weaning | <i>Gpr3711</i>      | -4.21 | $9 \times 10^{-8}$ |
| MIA-by-Weaning | <i>C4h8orf46</i>    | -4.03 | $2 \times 10^{-8}$ |
| MIA-by-Weaning | <i>Oxt</i>          | -4.00 | $2 \times 10^{-8}$ |

|                |                     |       |                    |
|----------------|---------------------|-------|--------------------|
| MIA-by-Weaning | <i>Ppp1r14a</i>     | -3.99 | $2 \times 10^{-8}$ |
| MIA-by-Weaning | <i>Adora1</i>       | -3.93 | $1 \times 10^{-8}$ |
| MIA-by-Weaning | <i>Rab33a</i>       | -3.93 | $3 \times 10^{-8}$ |
| MIA-by-Weaning | <i>Loc100620470</i> | -3.83 | $8 \times 10^{-8}$ |
| MIA-by-Weaning | <i>Gpr17</i>        | -3.74 | $2 \times 10^{-8}$ |
| MIA-by-Weaning | <i>Fam135b</i>      | -3.75 | $3 \times 10^{-8}$ |
| MIA-by-Weaning | <i>Acsbg1</i>       | -3.64 | $6 \times 10^{-8}$ |
| MIA-by-Weaning | <i>Mpped1</i>       | -3.67 | $7 \times 10^{-8}$ |
| MIA-by-Weaning | <i>Ddn</i>          | -3.63 | $9 \times 10^{-8}$ |
| MIA-by-Weaning | <i>Loc100624063</i> | -3.84 | $1 \times 10^{-8}$ |
| MIA-by-Weaning | <i>S1pr5</i>        | -3.63 | $1 \times 10^{-8}$ |
| MIA-by-Weaning | <i>Foxg1</i>        | -3.68 | $4 \times 10^{-8}$ |
| MIA-by-Weaning | <i>Slc22a2</i>      | 3.79  | $5 \times 10^{-8}$ |
| MIA-by-Weaning | <i>Adap1</i>        | -3.45 | $1 \times 10^{-8}$ |
| MIA-by-Weaning | <i>Gad1</i>         | -3.48 | $1 \times 10^{-8}$ |
| MIA-by-Weaning | <i>Plip</i>         | -3.4  | $2 \times 10^{-8}$ |
| MIA-by-Weaning | <i>Neurod2</i>      | -3.51 | $2 \times 10^{-8}$ |
| MIA-by-Weaning | <i>Myrf</i>         | -3.38 | $3 \times 10^{-8}$ |
| MIA-by-Weaning | <i>Loc110257903</i> | 4.04  | $5 \times 10^{-8}$ |
| MIA-by-Weaning | <i>Cnp</i>          | -3.29 | $8 \times 10^{-8}$ |
| MIA-by-Weaning | <i>Gal3st1</i>      | -3.31 | $8 \times 10^{-8}$ |
| MIA-by-Weaning | <i>Ecel1</i>        | 3.34  | $1 \times 10^{-8}$ |
| MIA-by-Weaning | <i>Efh1</i>         | -3.28 | $1 \times 10^{-8}$ |
| MIA-by-Weaning | <i>Unc13c</i>       | -3.30 | $2 \times 10^{-8}$ |
| MIA-by-Weaning | <i>Grin2a</i>       | -3.27 | $5 \times 10^{-8}$ |
| MIA-by-Weaning | <i>Ca14</i>         | -3.22 | $6 \times 10^{-8}$ |
| MIA-by-Weaning | <i>Egr3</i>         | -3.26 | $7 \times 10^{-8}$ |
| MIA-by-Weaning | <i>Pygm</i>         | -3.08 | $2 \times 10^{-8}$ |
| MIA-by-Weaning | <i>Sult1a3</i>      | 3.18  | $2 \times 10^{-8}$ |
| MIA-by-Weaning | <i>Loc100512593</i> | -3.17 | $2 \times 10^{-8}$ |
| MIA-by-Weaning | <i>Slc1a3</i>       | -3.04 | $2 \times 10^{-8}$ |
| MIA-by-Weaning | <i>Cldn11</i>       | -3.03 | $3 \times 10^{-8}$ |
| MIA-by-Weaning | <i>Ubd</i>          | 3.57  | $3 \times 10^{-8}$ |
| MIA-by-Weaning | <i>Col2a1</i>       | 3.07  | $3 \times 10^{-8}$ |
| MIA-by-Weaning | <i>Rab7b</i>        | -3.06 | $3 \times 10^{-8}$ |
| MIA-by-Weaning | <i>Gbp1</i>         | 3.05  | $3 \times 10^{-8}$ |
| MIA-by-Weaning | <i>Cabp1</i>        | -3.05 | $3 \times 10^{-8}$ |
| MIA-by-Weaning | <i>Camk2a</i>       | -3.00 | $4 \times 10^{-8}$ |
| MIA-by-Weaning | <i>Ap1n</i>         | -3.01 | $4 \times 10^{-8}$ |
| MIA-by-Weaning | <i>Paqr6</i>        | -2.99 | $4 \times 10^{-8}$ |

|                |                     |       |                    |
|----------------|---------------------|-------|--------------------|
| MIA-by-Weaning | <i>Dmbt1</i>        | 3.34  | $4 \times 10^{-8}$ |
| MIA-by-Weaning | <i>Cdh19</i>        | -3.24 | $4 \times 10^{-8}$ |
| MIA-by-Weaning | <i>Fgfr3</i>        | -2.99 | $5 \times 10^{-8}$ |
| MIA-by-Weaning | <i>Scd</i>          | -2.96 | $6 \times 10^{-8}$ |
| MIA-by-Weaning | <i>Gpr50</i>        | 3.42  | $6 \times 10^{-8}$ |
| MIA-by-Weaning | <i>Egr4</i>         | -3.16 | $7 \times 10^{-8}$ |
| MIA-by-Weaning | <i>Prss56</i>       | 3.03  | $7 \times 10^{-8}$ |
| MIA-by-Weaning | <i>Comp</i>         | 3.19  | $8 \times 10^{-8}$ |
| MIA-by-Weaning | <i>Tmem155</i>      | -3.10 | $8 \times 10^{-8}$ |
| MIA-by-Weaning | <i>Mfsd2a</i>       | -2.95 | $8 \times 10^{-8}$ |
| MIA-by-Weaning | <i>Mgat5b</i>       | -3.03 | $9 \times 10^{-8}$ |
| MIA-by-Weaning | <i>Nrgn</i>         | -2.89 | $1 \times 10^{-7}$ |
| MIA-by-Weaning | <i>Slc5a11</i>      | -3.01 | $1 \times 10^{-7}$ |
| MIA-by-Weaning | <i>Kcna2</i>        | -2.91 | $1 \times 10^{-7}$ |
| MIA-by-Weaning | <i>Stmn4</i>        | -2.88 | $2 \times 10^{-7}$ |
| MIA-by-Weaning | <i>Th</i>           | -3.04 | $2 \times 10^{-7}$ |
| MIA-by-Weaning | <i>Loc106505443</i> | 3.64  | $2 \times 10^{-7}$ |
| MIA-by-Weaning | <i>Wnt7b</i>        | -2.98 | $2 \times 10^{-7}$ |
| MIA-by-Weaning | <i>Snx22</i>        | -2.88 | $2 \times 10^{-7}$ |
| MIA-by-Weaning | <i>Pou3f2</i>       | -2.9  | $2 \times 10^{-7}$ |
| MIA-by-Weaning | <i>Arhgdig</i>      | -2.97 | $2 \times 10^{-7}$ |
| MIA-by-Weaning | <i>Fabp3</i>        | -2.87 | $2 \times 10^{-7}$ |
| MIA-by-Weaning | <i>Chrm1</i>        | -2.93 | $2 \times 10^{-7}$ |
| MIA-by-Weaning | <i>Shmt1</i>        | -2.85 | $3 \times 10^{-7}$ |
| MIA-by-Weaning | <i>Sox21</i>        | -3.08 | $3 \times 10^{-7}$ |
| MIA-by-Weaning | <i>Shank1</i>       | -2.82 | $3 \times 10^{-7}$ |
| MIA-by-Weaning | <i>Aqp4</i>         | -2.81 | $3 \times 10^{-7}$ |
| MIA-by-Weaning | <i>Evi2a</i>        | -2.81 | $4 \times 10^{-7}$ |
| MIA-by-Weaning | <i>Tpo</i>          | 2.85  | $6 \times 10^{-7}$ |
| MIA-by-Weaning | <i>Lhx9</i>         | 3.09  | $6 \times 10^{-7}$ |
| MIA-by-Weaning | <i>Osr1</i>         | 2.91  | $7 \times 10^{-7}$ |
| MIA-by-Weaning | <i>Rbfox3</i>       | -2.79 | $7 \times 10^{-7}$ |
| MIA-by-Weaning | <i>Bcas1</i>        | -2.72 | $9 \times 10^{-7}$ |
| MIA-by-Weaning | <i>Adcy1</i>        | -2.71 | $1 \times 10^{-6}$ |
| MIA-by-Weaning | <i>Lingo1</i>       | -2.70 | $1 \times 10^{-6}$ |
| MIA-by-Weaning | <i>Ttr</i>          | -2.91 | $2 \times 10^{-6}$ |
| MIA-by-Weaning | <i>St8sia6</i>      | 2.7   | $2 \times 10^{-6}$ |
| MIA-by-Weaning | <i>Prima1</i>       | -2.69 | $2 \times 10^{-6}$ |
| MIA-by-Weaning | <i>Tac1</i>         | 2.72  | $2 \times 10^{-6}$ |
| MIA-by-Weaning | <i>F5</i>           | -2.66 | $2 \times 10^{-6}$ |

|                |                     |       |                    |
|----------------|---------------------|-------|--------------------|
| MIA-by-Weaning | <i>Rasgrp1</i>      | -2.69 | $2 \times 10^{-6}$ |
| MIA-by-Weaning | <i>Fezf1</i>        | 2.71  | $3 \times 10^{-6}$ |
| MIA-by-Weaning | <i>Gabre</i>        | 2.66  | $3 \times 10^{-6}$ |
| MIA-by-Weaning | <i>Slc1a6</i>       | -2.67 | $3 \times 10^{-6}$ |
| MIA-by-Weaning | <i>Grin1</i>        | -2.63 | $4 \times 10^{-6}$ |
| MIA-by-Weaning | <i>Dio3</i>         | 2.71  | $4 \times 10^{-6}$ |
| MIA-by-Weaning | <i>Ca4</i>          | -2.73 | $4 \times 10^{-6}$ |
| MIA-by-Weaning | <i>Prr18</i>        | -2.58 | $5 \times 10^{-6}$ |
| MIA-by-Weaning | <i>Ncan</i>         | -2.57 | $5 \times 10^{-6}$ |
| MIA-by-Weaning | <i>Ltc4s</i>        | -2.71 | $5 \times 10^{-6}$ |
| MIA-by-Weaning | <i>Cecr6</i>        | -2.61 | $5 \times 10^{-6}$ |
| MIA-by-Weaning | <i>Mfrp</i>         | 2.92  | $6 \times 10^{-6}$ |
| MIA-by-Weaning | <i>Arc</i>          | -2.56 | $6 \times 10^{-6}$ |
| MIA-by-Weaning | <i>Loc106510131</i> | -2.55 | $7 \times 10^{-6}$ |
| MIA-by-Weaning | <i>Omg</i>          | -2.54 | $7 \times 10^{-6}$ |
| MIA-by-Weaning | <i>Cldn19</i>       | -3.50 | $7 \times 10^{-6}$ |
| MIA-by-Weaning | <i>Kcne4</i>        | -2.73 | $8 \times 10^{-6}$ |
| MIA-by-Weaning | <i>Loc110257701</i> | 2.76  | $9 \times 10^{-6}$ |
| MIA-by-Weaning | <i>Kcnip1</i>       | -2.61 | $1 \times 10^{-5}$ |
| MIA-by-Weaning | <i>Ambn</i>         | 2.66  | $1 \times 10^{-5}$ |
| MIA-by-Weaning | <i>Rprml</i>        | -2.55 | $1 \times 10^{-5}$ |
| MIA-by-Weaning | <i>Gfra3</i>        | 2.55  | $1 \times 10^{-5}$ |
| MIA-by-Weaning | <i>Loc100157711</i> | -2.55 | $1 \times 10^{-5}$ |
| MIA-by-Weaning | <i>Nlrc5</i>        | 2.51  | $1 \times 10^{-5}$ |
| MIA-by-Weaning | <i>Hdc</i>          | 2.69  | $1 \times 10^{-5}$ |
| MIA-by-Weaning | <i>Gal</i>          | 2.6   | $2 \times 10^{-5}$ |
| MIA-by-Weaning | <i>Pdlim4</i>       | -2.54 | $2 \times 10^{-5}$ |
| MIA-by-Weaning | <i>Slc6a7</i>       | -2.52 | $2 \times 10^{-5}$ |
| MIA-by-Weaning | <i>Loc110257816</i> | 2.56  | $2 \times 10^{-5}$ |
| MIA-by-Weaning | <i>Lpar3</i>        | 2.91  | $2 \times 10^{-5}$ |
| MIA-by-Weaning | <i>T</i>            | 2.64  | $6 \times 10^{-5}$ |
| MIA-by-Weaning | <i>Uts2r</i>        | 2.55  | $1 \times 10^{-4}$ |
| MIA-by-Weaning | <i>Loc100038328</i> | 3.20  | $4 \times 10^{-2}$ |
| MIA-by-Sex     | <i>Hapln2</i>       | 12.00 | $3 \times 10^{-8}$ |
| MIA-by-Sex     | <i>Gjb1</i>         | 11.72 | $3 \times 10^{-8}$ |
| MIA-by-Sex     | <i>Gfap</i>         | 9.91  | $7 \times 10^{-8}$ |
| MIA-by-Sex     | <i>Mbp</i>          | 9.38  | $1 \times 10^{-8}$ |
| MIA-by-Sex     | <i>Tf</i>           | 9.34  | $5 \times 10^{-8}$ |
| MIA-by-Sex     | <i>Ermn</i>         | 9.02  | $1 \times 10^{-8}$ |
| MIA-by-Sex     | <i>Mobp</i>         | 8.88  | $1 \times 10^{-8}$ |

|            |                     |      |                    |
|------------|---------------------|------|--------------------|
| MIA-by-Sex | <i>Plp1</i>         | 8.73 | $4 \times 10^{-8}$ |
| MIA-by-Sex | <i>Loc110261683</i> | 8.96 | $2 \times 10^{-8}$ |
| MIA-by-Sex | <i>Mog</i>          | 8.76 | $1 \times 10^{-8}$ |
| MIA-by-Sex | <i>Mal</i>          | 8.75 | $2 \times 10^{-8}$ |
| MIA-by-Sex | <i>Gjc2</i>         | 8.15 | $2 \times 10^{-8}$ |
| MIA-by-Sex | <i>Fa2h</i>         | 7.99 | $2 \times 10^{-8}$ |
| MIA-by-Sex | <i>Cmtm5</i>        | 7.98 | $2 \times 10^{-8}$ |
| MIA-by-Sex | <i>Mag</i>          | 7.61 | $5 \times 10^{-8}$ |
| MIA-by-Sex | <i>Agt</i>          | 7.40 | $3 \times 10^{-8}$ |
| MIA-by-Sex | <i>Nkx6-1</i>       | 7.69 | $4 \times 10^{-8}$ |
| MIA-by-Sex | <i>Ugt8</i>         | 7.38 | $5 \times 10^{-8}$ |
| MIA-by-Sex | <i>Nkx6-2</i>       | 7.39 | $1 \times 10^{-8}$ |
| MIA-by-Sex | <i>C14h10orf105</i> | 7.23 | $5 \times 10^{-8}$ |
| MIA-by-Sex | <i>Tmem88b</i>      | 7.12 | $1 \times 10^{-8}$ |
| MIA-by-Sex | <i>Paqr6</i>        | 6.84 | $4 \times 10^{-8}$ |
| MIA-by-Sex | <i>Tubb4a</i>       | 6.82 | $6 \times 10^{-8}$ |
| MIA-by-Sex | <i>Sh3tc2</i>       | 6.96 | $1 \times 10^{-8}$ |
| MIA-by-Sex | <i>Gpr3711</i>      | 6.71 | $9 \times 10^{-8}$ |
| MIA-by-Sex | <i>Slc14a1</i>      | 6.90 | $1 \times 10^{-8}$ |
| MIA-by-Sex | <i>Efh1</i>         | 6.64 | $5 \times 10^{-8}$ |
| MIA-by-Sex | <i>Mlc1</i>         | 6.61 | $8 \times 10^{-8}$ |
| MIA-by-Sex | <i>Sgk2</i>         | 6.73 | $1 \times 10^{-8}$ |
| MIA-by-Sex | <i>Synpo2l</i>      | 6.50 | $4 \times 10^{-8}$ |
| MIA-by-Sex | <i>Evi2a</i>        | 6.36 | $5 \times 10^{-8}$ |
| MIA-by-Sex | <i>Sox10</i>        | 6.25 | $1 \times 10^{-8}$ |
| MIA-by-Sex | <i>Slc5a11</i>      | 6.33 | $2 \times 10^{-8}$ |
| MIA-by-Sex | <i>Ppp1r14a</i>     | 6.08 | $2 \times 10^{-8}$ |
| MIA-by-Sex | <i>Apod</i>         | 5.96 | $2 \times 10^{-8}$ |
| MIA-by-Sex | <i>Gal</i>          | 6.07 | $7 \times 10^{-8}$ |
| MIA-by-Sex | <i>Rab7b</i>        | 6.01 | $7 \times 10^{-8}$ |
| MIA-by-Sex | <i>Irx1</i>         | 6.41 | $1 \times 10^{-8}$ |
| MIA-by-Sex | <i>Opalin</i>       | 5.89 | $1 \times 10^{-8}$ |
| MIA-by-Sex | <i>Kctd4</i>        | 6.12 | $6 \times 10^{-8}$ |
| MIA-by-Sex | <i>C14h10orf90</i>  | 5.9  | $1 \times 10^{-8}$ |
| MIA-by-Sex | <i>Adamts4</i>      | 5.8  | $2 \times 10^{-8}$ |
| MIA-by-Sex | <i>Zic1</i>         | 5.74 | $1 \times 10^{-8}$ |
| MIA-by-Sex | <i>Olig1</i>        | 5.63 | $2 \times 10^{-8}$ |
| MIA-by-Sex | <i>Fabp7</i>        | 5.54 | $1 \times 10^{-8}$ |
| MIA-by-Sex | <i>Gabrq</i>        | 6.53 | $2 \times 10^{-8}$ |
| MIA-by-Sex | <i>Ttyh1</i>        | 5.48 | $5 \times 10^{-8}$ |



|            |                     |       |                    |
|------------|---------------------|-------|--------------------|
| MIA-by-Sex | <i>Slc17a7</i>      | -5.36 | $9 \times 10^{-8}$ |
| MIA-by-Sex | <i>S1pr5</i>        | 5.47  | $1 \times 10^{-8}$ |
| MIA-by-Sex | <i>Pdlim4</i>       | 5.52  | $1 \times 10^{-8}$ |
| MIA-by-Sex | <i>Pou3f3</i>       | 5.33  | $9 \times 10^{-8}$ |
| MIA-by-Sex | <i>Nkd1</i>         | 5.19  | $1 \times 10^{-8}$ |
| MIA-by-Sex | <i>Snx22</i>        | 5.14  | $2 \times 10^{-8}$ |
| MIA-by-Sex | <i>Cnmd</i>         | 5.17  | $3 \times 10^{-8}$ |
| MIA-by-Sex | <i>Kcnp1</i>        | 5.23  | $4 \times 10^{-8}$ |
| MIA-by-Sex | <i>Atp10b</i>       | 5.25  | $4 \times 10^{-8}$ |
| MIA-by-Sex | <i>Zic5</i>         | 5.40  | $6 \times 10^{-8}$ |
| MIA-by-Sex | <i>Loc110256043</i> | 5.12  | $6 \times 10^{-8}$ |
| MIA-by-Sex | <i>Fam135b</i>      | 5.06  | $4 \times 10^{-8}$ |
| MIA-by-Sex | <i>Aspa</i>         | 5.07  | $6 \times 10^{-8}$ |
| MIA-by-Sex | <i>Ndp</i>          | 5.07  | $6 \times 10^{-8}$ |
| MIA-by-Sex | <i>Kcnj10</i>       | 4.93  | $7 \times 10^{-8}$ |
| MIA-by-Sex | <i>Calb2</i>        | 5.01  | $1 \times 10^{-8}$ |
| MIA-by-Sex | <i>Fez1</i>         | 4.86  | $2 \times 10^{-8}$ |
| MIA-by-Sex | <i>Flt3</i>         | 5.04  | $2 \times 10^{-8}$ |
| MIA-by-Sex | <i>Emilin2</i>      | 4.88  | $3 \times 10^{-8}$ |
| MIA-by-Sex | <i>Bcan</i>         | 4.83  | $4 \times 10^{-8}$ |
| MIA-by-Sex | <i>Cldn11</i>       | 4.71  | $3 \times 10^{-8}$ |
| MIA-by-Sex | <i>Olig2</i>        | 4.74  | $3 \times 10^{-8}$ |
| MIA-by-Sex | <i>Loc110255851</i> | 4.90  | $4 \times 10^{-8}$ |
| MIA-by-Sex | <i>Aplnr</i>        | 4.69  | $4 \times 10^{-8}$ |
| MIA-by-Sex | <i>Apoe</i>         | 4.57  | $3 \times 10^{-8}$ |
| MIA-by-Sex | <i>Myrf</i>         | 4.57  | $3 \times 10^{-8}$ |
| MIA-by-Sex | <i>Dthd1</i>        | 4.75  | $7 \times 10^{-8}$ |
| MIA-by-Sex | <i>Rflnb</i>        | 4.52  | $7 \times 10^{-8}$ |
| MIA-by-Sex | <i>Aqp4</i>         | 4.49  | $1 \times 10^{-8}$ |
| MIA-by-Sex | <i>Gal3st1</i>      | 4.5   | $1 \times 10^{-8}$ |
| MIA-by-Sex | <i>Plxnb3</i>       | 4.51  | $1 \times 10^{-8}$ |
| MIA-by-Sex | <i>Homer3</i>       | 4.47  | $2 \times 10^{-8}$ |
| MIA-by-Sex | <i>Hepacam</i>      | 4.46  | $2 \times 10^{-8}$ |
| MIA-by-Sex | <i>Ca14</i>         | 4.55  | $2 \times 10^{-8}$ |
| MIA-by-Sex | <i>Cnp</i>          | 4.43  | $3 \times 10^{-8}$ |
| MIA-by-Sex | <i>Pla2r1</i>       | 4.44  | $4 \times 10^{-8}$ |
| MIA-by-Sex | <i>Plip</i>         | 4.41  | $4 \times 10^{-8}$ |
| MIA-by-Sex | <i>Comp</i>         | 5.06  | $5 \times 10^{-8}$ |
| MIA-by-Sex | <i>Cxcl10</i>       | 4.43  | $6 \times 10^{-8}$ |
| MIA-by-Sex | <i>Pdyn</i>         | 4.44  | $8 \times 10^{-8}$ |

|            |                  |       |                    |
|------------|------------------|-------|--------------------|
| MIA-by-Sex | <i>Slc5a5</i>    | 4.61  | $2 \times 10^{-8}$ |
| MIA-by-Sex | <i>Gdf1</i>      | 4.25  | $6 \times 10^{-8}$ |
| MIA-by-Sex | <i>Elfn2</i>     | 4.25  | $9 \times 10^{-8}$ |
| MIA-by-Sex | <i>Col11a2</i>   | 4.28  | $9 \times 10^{-8}$ |
| MIA-by-Sex | <i>Lcat</i>      | 4.36  | $1 \times 10^{-8}$ |
| MIA-by-Sex | <i>Cp</i>        | 4.24  | $1 \times 10^{-8}$ |
| MIA-by-Sex | <i>Slc1a6</i>    | 4.28  | $1 \times 10^{-8}$ |
| MIA-by-Sex | <i>Lgi4</i>      | 4.2   | $2 \times 10^{-8}$ |
| MIA-by-Sex | <i>Grm3</i>      | 4.50  | $2 \times 10^{-8}$ |
| MIA-by-Sex | <i>Smoc1</i>     | 4.18  | $2 \times 10^{-8}$ |
| MIA-by-Sex | <i>Rab33a</i>    | 4.22  | $2 \times 10^{-8}$ |
| MIA-by-Sex | <i>Ido1</i>      | 4.45  | $3 \times 10^{-8}$ |
| MIA-by-Sex | <i>Ada</i>       | 4.19  | $3 \times 10^{-8}$ |
| MIA-by-Sex | <i>Sox21</i>     | 4.43  | $3 \times 10^{-8}$ |
| MIA-by-Sex | <i>Ttyh2</i>     | 4.12  | $4 \times 10^{-8}$ |
| MIA-by-Sex | <i>Cbr3</i>      | 4.41  | $5 \times 10^{-8}$ |
| MIA-by-Sex | <i>Cldn10</i>    | 4.19  | $5 \times 10^{-8}$ |
| MIA-by-Sex | <i>Cryab</i>     | 4.1   | $6 \times 10^{-8}$ |
| MIA-by-Sex | <i>Apln</i>      | 4.11  | $6 \times 10^{-8}$ |
| MIA-by-Sex | <i>Th</i>        | 4.54  | $9 \times 10^{-8}$ |
| MIA-by-Sex | <i>Cpxm2</i>     | 4.04  | $2 \times 10^{-8}$ |
| MIA-by-Sex | <i>Erbp3</i>     | 4.03  | $2 \times 10^{-8}$ |
| MIA-by-Sex | <i>Fgfr4</i>     | 4.15  | $3 \times 10^{-8}$ |
| MIA-by-Sex | <i>S100a1</i>    | 3.96  | $5 \times 10^{-8}$ |
| MIA-by-Sex | <i>Plekhb1</i>   | 3.95  | $5 \times 10^{-8}$ |
| MIA-by-Sex | <i>S100a6</i>    | 3.98  | $5 \times 10^{-8}$ |
| MIA-by-Sex | <i>Sult1a3</i>   | 4.03  | $5 \times 10^{-8}$ |
| MIA-by-Sex | <i>C4h8orf46</i> | 3.96  | $6 \times 10^{-8}$ |
| MIA-by-Sex | <i>Ddn</i>       | -3.89 | $8 \times 10^{-8}$ |
| MIA-by-Sex | <i>Mmp28</i>     | 3.93  | $1 \times 10^{-8}$ |
| MIA-by-Sex | <i>Zic2</i>      | 3.97  | $1 \times 10^{-8}$ |
| MIA-by-Sex | <i>Fam159b</i>   | 3.99  | $2 \times 10^{-8}$ |
| MIA-by-Sex | <i>Aif1l</i>     | 3.90  | $2 \times 10^{-8}$ |
| MIA-by-Sex | <i>Gpr17</i>     | 3.89  | $2 \times 10^{-8}$ |
| MIA-by-Sex | <i>Cers1</i>     | 3.84  | $3 \times 10^{-8}$ |
| MIA-by-Sex | <i>Prr18</i>     | 3.82  | $4 \times 10^{-8}$ |
| MIA-by-Sex | <i>Gfra3</i>     | 3.86  | $4 \times 10^{-8}$ |
| MIA-by-Sex | <i>Prima1</i>    | 3.83  | $5 \times 10^{-8}$ |
| MIA-by-Sex | <i>Nphs1</i>     | -3.83 | $6 \times 10^{-8}$ |
| MIA-by-Sex | <i>Map6d1</i>    | 3.77  | $9 \times 10^{-8}$ |

|            |                     |       |                    |
|------------|---------------------|-------|--------------------|
| MIA-by-Sex | <i>Slc2a5</i>       | 3.81  | $9 \times 10^{-8}$ |
| MIA-by-Sex | <i>Kcna6</i>        | 3.74  | $1 \times 10^{-8}$ |
| MIA-by-Sex | <i>Gpr37</i>        | 3.74  | $1 \times 10^{-8}$ |
| MIA-by-Sex | <i>Adap1</i>        | 3.75  | $1 \times 10^{-8}$ |
| MIA-by-Sex | <i>Foxg1</i>        | -3.85 | $2 \times 10^{-8}$ |
| MIA-by-Sex | <i>Omg</i>          | 3.71  | $2 \times 10^{-8}$ |
| MIA-by-Sex | <i>Loc110257903</i> | 4.41  | $4 \times 10^{-8}$ |
| MIA-by-Sex | <i>Lrrc71</i>       | 3.74  | $4 \times 10^{-8}$ |
| MIA-by-Sex | <i>Fabp3</i>        | 3.66  | $5 \times 10^{-8}$ |
| MIA-by-Sex | <i>Ctnna3</i>       | 3.68  | $7 \times 10^{-8}$ |
| MIA-by-Sex | <i>Stmn4</i>        | 3.62  | $7 \times 10^{-8}$ |
| MIA-by-Sex | <i>Sbspon</i>       | 3.71  | $8 \times 10^{-8}$ |
| MIA-by-Sex | <i>Smox</i>         | 3.57  | $2 \times 10^{-8}$ |
| MIA-by-Sex | <i>Neurod2</i>      | -3.62 | $3 \times 10^{-8}$ |
| MIA-by-Sex | <i>Rsad2</i>        | 3.52  | $4 \times 10^{-8}$ |
| MIA-by-Sex | <i>Tmem63a</i>      | 3.46  | $8 \times 10^{-8}$ |
| MIA-by-Sex | <i>Gpd1</i>         | 3.45  | $9 \times 10^{-8}$ |
| MIA-by-Sex | <i>Gbp1</i>         | 3.43  | $1 \times 10^{-8}$ |
| MIA-by-Sex | <i>Tmem144</i>      | 3.41  | $2 \times 10^{-8}$ |
| MIA-by-Sex | <i>Ubd</i>          | 3.77  | $2 \times 10^{-8}$ |
| MIA-by-Sex | <i>Chn2</i>         | 3.40  | $2 \times 10^{-8}$ |
| MIA-by-Sex | <i>Dbnnd2</i>       | 3.37  | $3 \times 10^{-8}$ |
| MIA-by-Sex | <i>Loc100156167</i> | 3.6   | $3 \times 10^{-8}$ |
| MIA-by-Sex | <i>Loc100524517</i> | 3.47  | $4 \times 10^{-8}$ |
| MIA-by-Sex | <i>Daam2</i>        | 3.33  | $4 \times 10^{-8}$ |
| MIA-by-Sex | <i>Slc18a2</i>      | 3.45  | $4 \times 10^{-8}$ |
| MIA-by-Sex | <i>Neu4</i>         | 3.36  | $5 \times 10^{-8}$ |
| MIA-by-Sex | <i>Grin2a</i>       | -3.4  | $5 \times 10^{-8}$ |
| MIA-by-Sex | <i>Sdcbp2</i>       | 3.41  | $5 \times 10^{-8}$ |
| MIA-by-Sex | <i>Plac8</i>        | 3.36  | $5 \times 10^{-8}$ |
| MIA-by-Sex | <i>Fam131b</i>      | 3.33  | $5 \times 10^{-8}$ |
| MIA-by-Sex | <i>Actc1</i>        | 3.43  | $5 \times 10^{-8}$ |
| MIA-by-Sex | <i>Lsp1</i>         | 3.31  | $6 \times 10^{-8}$ |
| MIA-by-Sex | <i>Smim5</i>        | 3.34  | $7 \times 10^{-8}$ |
| MIA-by-Sex | <i>Cd38</i>         | 3.32  | $7 \times 10^{-8}$ |
| MIA-by-Sex | <i>Slc16a4</i>      | 3.42  | $9 \times 10^{-8}$ |
| MIA-by-Sex | <i>Bfsp2</i>        | 3.39  | $9 \times 10^{-8}$ |
| MIA-by-Sex | <i>Ecel1</i>        | 3.31  | $9 \times 10^{-8}$ |
| MIA-by-Sex | <i>Col2a1</i>       | 3.28  | $1 \times 10^{-8}$ |
| MIA-by-Sex | <i>C2</i>           | 3.29  | $1 \times 10^{-8}$ |

|            |                     |       |                    |
|------------|---------------------|-------|--------------------|
| MIA-by-Sex | <i>Ndrp1</i>        | 3.23  | $2 \times 10^{-8}$ |
| MIA-by-Sex | <i>Shmt1</i>        | 3.24  | $2 \times 10^{-8}$ |
| MIA-by-Sex | <i>Entpd2</i>       | 3.30  | $2 \times 10^{-8}$ |
| MIA-by-Sex | <i>Rasgrp1</i>      | -3.24 | $2 \times 10^{-8}$ |
| MIA-by-Sex | <i>Dhrs9</i>        | 3.49  | $2 \times 10^{-8}$ |
| MIA-by-Sex | <i>Osr1</i>         | 3.36  | $2 \times 10^{-8}$ |
| MIA-by-Sex | <i>Coro2b</i>       | 3.20  | $2 \times 10^{-8}$ |
| MIA-by-Sex | <i>B4galnt1</i>     | 3.22  | $2 \times 10^{-8}$ |
| MIA-by-Sex | <i>Isg15</i>        | 3.19  | $3 \times 10^{-8}$ |
| MIA-by-Sex | <i>Kcnk10</i>       | 3.19  | $3 \times 10^{-8}$ |
| MIA-by-Sex | <i>Slc22a2</i>      | 3.42  | $4 \times 10^{-8}$ |
| MIA-by-Sex | <i>Tesk2</i>        | 3.17  | $4 \times 10^{-8}$ |
| MIA-by-Sex | <i>Il34</i>         | 3.14  | $5 \times 10^{-8}$ |
| MIA-by-Sex | <i>Hspa2</i>        | 3.14  | $5 \times 10^{-8}$ |
| MIA-by-Sex | <i>Dnajb13</i>      | 3.27  | $5 \times 10^{-8}$ |
| MIA-by-Sex | <i>Loc100738720</i> | 3.30  | $5 \times 10^{-8}$ |
| MIA-by-Sex | <i>Sema7a</i>       | 3.14  | $6 \times 10^{-8}$ |
| MIA-by-Sex | <i>Sept4</i>        | 3.12  | $6 \times 10^{-8}$ |
| MIA-by-Sex | <i>F5</i>           | -3.1  | $6 \times 10^{-8}$ |
| MIA-by-Sex | <i>Ldlr</i>         | 3.11  | $7 \times 10^{-8}$ |
| MIA-by-Sex | <i>Lrrc75b</i>      | 3.30  | $8 \times 10^{-8}$ |
| MIA-by-Sex | <i>Kcna1</i>        | 3.11  | $8 \times 10^{-8}$ |
| MIA-by-Sex | <i>Fcgr1a</i>       | 3.14  | $9 \times 10^{-8}$ |
| MIA-by-Sex | <i>Mob3b</i>        | 3.11  | $1 \times 10^{-8}$ |
| MIA-by-Sex | <i>Nr2f1</i>        | 3.09  | $1 \times 10^{-8}$ |
| MIA-by-Sex | <i>Itgb4</i>        | 3.09  | $1 \times 10^{-8}$ |
| MIA-by-Sex | <i>Galnt6</i>       | 3.11  | $1 \times 10^{-8}$ |
| MIA-by-Sex | <i>Pla1a</i>        | 3.19  | $2 \times 10^{-8}$ |
| MIA-by-Sex | <i>Anln</i>         | 3.04  | $2 \times 10^{-8}$ |
| MIA-by-Sex | <i>Rtkn</i>         | 3.04  | $2 \times 10^{-8}$ |
| MIA-by-Sex | <i>Agrp</i>         | 3.49  | $2 \times 10^{-8}$ |
| MIA-by-Sex | <i>Sox8</i>         | 3.02  | $2 \times 10^{-8}$ |
| MIA-by-Sex | <i>Sirt2</i>        | 3.01  | $2 \times 10^{-8}$ |
| MIA-by-Sex | <i>Zeb2</i>         | 3.02  | $2 \times 10^{-8}$ |
| MIA-by-Sex | <i>Adcyap1r1</i>    | 3.01  | $2 \times 10^{-8}$ |
| MIA-by-Sex | <i>Loc100157711</i> | 3.08  | $3 \times 10^{-8}$ |
| MIA-by-Sex | <i>Lrrn4cl</i>      | 3.03  | $3 \times 10^{-8}$ |
| MIA-by-Sex | <i>Marcks1</i>      | 3.00  | $3 \times 10^{-8}$ |
| MIA-by-Sex | <i>Loc102162293</i> | 3.11  | $3 \times 10^{-8}$ |
| MIA-by-Sex | <i>Cldn19</i>       | 3.72  | $3 \times 10^{-8}$ |

|            |                     |       |                    |
|------------|---------------------|-------|--------------------|
| MIA-by-Sex | <i>Lrrc55</i>       | 3.01  | $3 \times 10^{-8}$ |
| MIA-by-Sex | <i>Lrrc38</i>       | 3.11  | $3 \times 10^{-8}$ |
| MIA-by-Sex | <i>Nrgn</i>         | -2.94 | $4 \times 10^{-8}$ |
| MIA-by-Sex | <i>Wif1</i>         | 3.07  | $4 \times 10^{-8}$ |
| MIA-by-Sex | <i>Loc110257816</i> | 3.05  | $5 \times 10^{-8}$ |
| MIA-by-Sex | <i>Loc100623257</i> | 3.11  | $5 \times 10^{-8}$ |
| MIA-by-Sex | <i>Arsb</i>         | 2.94  | $6 \times 10^{-8}$ |
| MIA-by-Sex | <i>Hmgcs1</i>       | 2.94  | $6 \times 10^{-8}$ |
| MIA-by-Sex | <i>Cmya5</i>        | 2.98  | $6 \times 10^{-8}$ |
| MIA-by-Sex | <i>Slc26a7</i>      | 2.96  | $6 \times 10^{-8}$ |
| MIA-by-Sex | <i>Aatk</i>         | 2.91  | $7 \times 10^{-8}$ |
| MIA-by-Sex | <i>Pygm</i>         | 2.91  | $8 \times 10^{-8}$ |
| MIA-by-Sex | <i>Loc110261221</i> | 2.91  | $8 \times 10^{-8}$ |
| MIA-by-Sex | <i>Psemb9</i>       | 2.94  | $8 \times 10^{-8}$ |
| MIA-by-Sex | <i>Gas2l2</i>       | 3.00  | $8 \times 10^{-8}$ |
| MIA-by-Sex | <i>Plac9</i>        | 2.93  | $9 \times 10^{-8}$ |
| MIA-by-Sex | <i>Unc13c</i>       | -2.94 | $1 \times 10^{-7}$ |
| MIA-by-Sex | <i>Otp</i>          | 3.36  | $1 \times 10^{-7}$ |
| MIA-by-Sex | <i>Sfrp5</i>        | 2.97  | $1 \times 10^{-7}$ |
| MIA-by-Sex | <i>Cabp1</i>        | -2.87 | $1 \times 10^{-7}$ |
| MIA-by-Sex | <i>Prr5l</i>        | 2.88  | $1 \times 10^{-7}$ |
| MIA-by-Sex | <i>Ifit3</i>        | 2.87  | $1 \times 10^{-7}$ |
| MIA-by-Sex | <i>Nlrc5</i>        | 2.87  | $1 \times 10^{-7}$ |
| MIA-by-Sex | <i>Clec18c</i>      | 2.85  | $2 \times 10^{-7}$ |
| MIA-by-Sex | <i>Inf2</i>         | 2.85  | $2 \times 10^{-7}$ |
| MIA-by-Sex | <i>Fscn1</i>        | 2.84  | $2 \times 10^{-7}$ |
| MIA-by-Sex | <i>Pmp22</i>        | 2.84  | $2 \times 10^{-7}$ |
| MIA-by-Sex | <i>Ada2</i>         | 2.85  | $2 \times 10^{-7}$ |
| MIA-by-Sex | <i>Loc110257199</i> | 2.96  | $2 \times 10^{-7}$ |
| MIA-by-Sex | <i>Ltc4s</i>        | 2.96  | $2 \times 10^{-7}$ |
| MIA-by-Sex | <i>Plcd3</i>        | 2.82  | $2 \times 10^{-7}$ |
| MIA-by-Sex | <i>Tac1</i>         | 2.87  | $2 \times 10^{-7}$ |
| MIA-by-Sex | <i>Bcas1</i>        | 2.81  | $2 \times 10^{-7}$ |
| MIA-by-Sex | <i>Ngb</i>          | 2.92  | $2 \times 10^{-7}$ |
| MIA-by-Sex | <i>Notum</i>        | 2.88  | $3 \times 10^{-7}$ |
| MIA-by-Sex | <i>Fndc9</i>        | 2.96  | $3 \times 10^{-7}$ |
| MIA-by-Sex | <i>Prph</i>         | 2.87  | $3 \times 10^{-7}$ |
| MIA-by-Sex | <i>Nwd1</i>         | 2.86  | $3 \times 10^{-7}$ |
| MIA-by-Sex | <i>Ambn</i>         | 2.93  | $3 \times 10^{-7}$ |
| MIA-by-Sex | <i>Rarres2</i>      | 2.78  | $3 \times 10^{-7}$ |

|            |                     |       |                    |
|------------|---------------------|-------|--------------------|
| MIA-by-Sex | <i>Kcnk13</i>       | 2.91  | $3 \times 10^{-7}$ |
| MIA-by-Sex | <i>Isg20</i>        | 3.38  | $4 \times 10^{-7}$ |
| MIA-by-Sex | <i>Cfb</i>          | 2.80  | $4 \times 10^{-7}$ |
| MIA-by-Sex | <i>Loc100155195</i> | 2.77  | $4 \times 10^{-7}$ |
| MIA-by-Sex | <i>Tmem151a</i>     | 2.74  | $5 \times 10^{-7}$ |
| MIA-by-Sex | <i>Ccl8</i>         | 2.9   | $5 \times 10^{-7}$ |
| MIA-by-Sex | <i>Loc100524923</i> | 2.77  | $6 \times 10^{-7}$ |
| MIA-by-Sex | <i>Adcy1</i>        | -2.69 | $7 \times 10^{-7}$ |
| MIA-by-Sex | <i>Cthrc1</i>       | 2.76  | $7 \times 10^{-7}$ |
| MIA-by-Sex | <i>Flvcr2</i>       | 2.78  | $7 \times 10^{-7}$ |
| MIA-by-Sex | <i>Atoh8</i>        | 2.75  | $1 \times 10^{-6}$ |
| MIA-by-Sex | <i>Cecr6</i>        | -2.7  | $1 \times 10^{-6}$ |
| MIA-by-Sex | <i>Pltp</i>         | 2.68  | $1 \times 10^{-6}$ |
| MIA-by-Sex | <i>Frmf1</i>        | 2.71  | $1 \times 10^{-6}$ |
| MIA-by-Sex | <i>Loc100158003</i> | 2.84  | $1 \times 10^{-6}$ |
| MIA-by-Sex | <i>Cbln4</i>        | 2.95  | $1 \times 10^{-6}$ |
| MIA-by-Sex | <i>Odf3b</i>        | 2.91  | $1 \times 10^{-6}$ |
| MIA-by-Sex | <i>Ret</i>          | 2.71  | $1 \times 10^{-6}$ |
| MIA-by-Sex | <i>Tmem132e</i>     | 2.76  | $1 \times 10^{-6}$ |
| MIA-by-Sex | <i>Foxj1</i>        | 2.67  | $2 \times 10^{-6}$ |
| MIA-by-Sex | <i>Slc13a3</i>      | 2.69  | $2 \times 10^{-6}$ |
| MIA-by-Sex | <i>Scrt1</i>        | -2.62 | $2 \times 10^{-6}$ |
| MIA-by-Sex | <i>St8sia5</i>      | 2.61  | $2 \times 10^{-6}$ |
| MIA-by-Sex | <i>Col5a3</i>       | 2.62  | $2 \times 10^{-6}$ |
| MIA-by-Sex | <i>Ube2l6</i>       | 2.62  | $2 \times 10^{-6}$ |
| MIA-by-Sex | <i>Pm20d1</i>       | 2.65  | $2 \times 10^{-6}$ |
| MIA-by-Sex | <i>Agpat4</i>       | 2.6   | $3 \times 10^{-6}$ |
| MIA-by-Sex | <i>Znf469</i>       | 2.66  | $3 \times 10^{-6}$ |
| MIA-by-Sex | <i>Vcam1</i>        | 2.60  | $3 \times 10^{-6}$ |
| MIA-by-Sex | <i>Ttr</i>          | 2.83  | $3 \times 10^{-6}$ |
| MIA-by-Sex | <i>Tmem155</i>      | -2.74 | $3 \times 10^{-6}$ |
| MIA-by-Sex | <i>Draxin</i>       | 2.69  | $3 \times 10^{-6}$ |
| MIA-by-Sex | <i>Foxc2</i>        | 2.69  | $3 \times 10^{-6}$ |
| MIA-by-Sex | <i>Bst2</i>         | 2.59  | $3 \times 10^{-6}$ |
| MIA-by-Sex | <i>Casp1</i>        | 2.64  | $3 \times 10^{-6}$ |
| MIA-by-Sex | <i>Trem2</i>        | 2.63  | $3 \times 10^{-6}$ |
| MIA-by-Sex | <i>Wnt2b</i>        | 2.65  | $3 \times 10^{-6}$ |
| MIA-by-Sex | <i>Grid1</i>        | 2.63  | $4 \times 10^{-6}$ |
| MIA-by-Sex | <i>Loc110257701</i> | 2.77  | $4 \times 10^{-6}$ |
| MIA-by-Sex | <i>Mfap5</i>        | 2.75  | $4 \times 10^{-6}$ |

|            |                     |       |                    |
|------------|---------------------|-------|--------------------|
| MIA-by-Sex | <i>Dapk2</i>        | 2.60  | $4 \times 10^{-6}$ |
| MIA-by-Sex | <i>Sept8</i>        | 2.56  | $4 \times 10^{-6}$ |
| MIA-by-Sex | <i>Oca2</i>         | 2.60  | $4 \times 10^{-6}$ |
| MIA-by-Sex | <i>Loc100156694</i> | 2.79  | $4 \times 10^{-6}$ |
| MIA-by-Sex | <i>Elovl1</i>       | 2.55  | $4 \times 10^{-6}$ |
| MIA-by-Sex | <i>Kif1c</i>        | 2.54  | $5 \times 10^{-6}$ |
| MIA-by-Sex | <i>Loc100523672</i> | 2.55  | $5 \times 10^{-6}$ |
| MIA-by-Sex | <i>Mapk15</i>       | 2.54  | $5 \times 10^{-6}$ |
| MIA-by-Sex | <i>Rasal3</i>       | 2.57  | $5 \times 10^{-6}$ |
| MIA-by-Sex | <i>Ifit1</i>        | 2.54  | $5 \times 10^{-6}$ |
| MIA-by-Sex | <i>Pip4k2a</i>      | 2.53  | $5 \times 10^{-6}$ |
| MIA-by-Sex | <i>Cdhr1</i>        | 2.53  | $5 \times 10^{-6}$ |
| MIA-by-Sex | <i>Cx3cr1</i>       | 2.54  | $5 \times 10^{-6}$ |
| MIA-by-Sex | <i>Loc100620470</i> | -2.54 | $6 \times 10^{-6}$ |
| MIA-by-Sex | <i>Gpr84</i>        | 2.78  | $6 \times 10^{-6}$ |
| MIA-by-Sex | <i>Clcn2</i>        | 2.52  | $6 \times 10^{-6}$ |
| MIA-by-Sex | <i>Ankrd65</i>      | 2.53  | $7 \times 10^{-6}$ |
| MIA-by-Sex | <i>Lgi3</i>         | 2.51  | $7 \times 10^{-6}$ |
| MIA-by-Sex | <i>Nrxn2</i>        | 2.50  | $7 \times 10^{-6}$ |
| MIA-by-Sex | <i>Adora3</i>       | 2.52  | $7 \times 10^{-6}$ |
| MIA-by-Sex | <i>Cd2</i>          | 2.60  | $9 \times 10^{-6}$ |
| MIA-by-Sex | <i>Csf3r</i>        | 2.64  | $2 \times 10^{-5}$ |
| MIA-by-Sex | <i>Irx6</i>         | 2.50  | $2 \times 10^{-5}$ |
| MIA-by-Sex | <i>F2</i>           | 2.54  | $2 \times 10^{-5}$ |
| MIA-by-Sex | <i>Lpar2</i>        | 2.52  | $2 \times 10^{-5}$ |
| MIA-by-Sex | <i>Hdc</i>          | 2.57  | $2 \times 10^{-5}$ |
| MIA-by-Sex | <i>Loc110259224</i> | 2.7   | $2 \times 10^{-5}$ |
| MIA-by-Sex | <i>Npw</i>          | 2.63  | $3 \times 10^{-5}$ |
| MIA-by-Sex | <i>Cbln1</i>        | 2.78  | $3 \times 10^{-5}$ |
| MIA-by-Sex | <i>Loc106505443</i> | 2.74  | $3 \times 10^{-4}$ |
| Weaning    | <i>Sst</i>          | -4.55 | $2 \times 10^{-8}$ |
| Weaning    | <i>Camkv</i>        | -4.25 | $7 \times 10^{-8}$ |
| Weaning    | <i>Loc102161214</i> | -5.20 | $3 \times 10^{-8}$ |
| Weaning    | <i>Avp</i>          | 3.81  | $2 \times 10^{-8}$ |
| Weaning    | <i>Gabrq</i>        | -3.93 | $9 \times 10^{-8}$ |
| Weaning    | <i>Vsnl1</i>        | -3.62 | $3 \times 10^{-8}$ |
| Weaning    | <i>Draxin</i>       | -3.63 | $5 \times 10^{-8}$ |
| Weaning    | <i>Loc100511183</i> | -3.52 | $6 \times 10^{-8}$ |
| Weaning    | <i>Cpne6</i>        | -3.33 | $4 \times 10^{-8}$ |
| Weaning    | <i>Sult1a3</i>      | -3.24 | $1 \times 10^{-8}$ |

|         |                     |       |                    |
|---------|---------------------|-------|--------------------|
| Weaning | <i>Slc5a5</i>       | -3.19 | $6 \times 10^{-8}$ |
| Weaning | <i>Gal</i>          | -3.11 | $3 \times 10^{-8}$ |
| Weaning | <i>Nptx1</i>        | -3.11 | $3 \times 10^{-8}$ |
| Weaning | <i>Grin1</i>        | -3.00 | $1 \times 10^{-8}$ |
| Weaning | <i>Fndc9</i>        | -3.07 | $1 \times 10^{-8}$ |
| Weaning | <i>Calb2</i>        | -2.97 | $2 \times 10^{-8}$ |
| Weaning | <i>Loc100158003</i> | -3.10 | $2 \times 10^{-8}$ |
| Weaning | <i>Loc110256043</i> | -2.86 | $2 \times 10^{-8}$ |
| Weaning | <i>Npy</i>          | -2.90 | $4 \times 10^{-8}$ |
| Weaning | <i>Cacna2d3</i>     | -2.86 | $5 \times 10^{-8}$ |
| Weaning | <i>Gfra3</i>        | -2.78 | $9 \times 10^{-8}$ |
| Weaning | <i>Atp5pd</i>       | -2.77 | $1 \times 10^{-8}$ |
| Weaning | <i>Nxph1</i>        | -2.85 | $2 \times 10^{-8}$ |
| Weaning | <i>Prss56</i>       | -2.74 | $2 \times 10^{-8}$ |
| Weaning | <i>Gabra3</i>       | -2.72 | $3 \times 10^{-8}$ |
| Weaning | <i>Odf3b</i>        | -2.89 | $5 \times 10^{-8}$ |
| Weaning | <i>Slc6a7</i>       | -2.71 | $5 \times 10^{-8}$ |
| Weaning | <i>Entpd2</i>       | -2.71 | $5 \times 10^{-8}$ |
| Weaning | <i>Osr1</i>         | -2.73 | $5 \times 10^{-8}$ |
| Weaning | <i>Loc110257903</i> | -3.28 | $6 \times 10^{-8}$ |
| Weaning | <i>Notum</i>        | -2.65 | $3 \times 10^{-8}$ |
| Weaning | <i>Tmem196</i>      | -2.73 | $7 \times 10^{-8}$ |
| Weaning | <i>Spata18</i>      | -2.61 | $7 \times 10^{-8}$ |
| Weaning | <i>Cpxm2</i>        | -2.52 | $8 \times 10^{-8}$ |
| Weaning | <i>Gpr50</i>        | -2.73 | $1 \times 10^{-8}$ |
| Weaning | <i>Cbln4</i>        | -2.58 | $2 \times 10^{-8}$ |
| Weaning | <i>Rgs14</i>        | -2.56 | $2 \times 10^{-8}$ |
| Weaning | <i>Hdc</i>          | -2.57 | $3 \times 10^{-8}$ |
| Weaning | <i>Gjb2</i>         | -2.55 | $6 \times 10^{-8}$ |
| Weaning | <i>Loc100525452</i> | -2.50 | $1 \times 10^{-8}$ |
| Weaning | <i>Ubd</i>          | -2.60 | $2 \times 10^{-7}$ |
| Weaning | <i>Eif1ay</i>       | 4.88  | $3 \times 10^{-6}$ |
| Weaning | <i>Loc100624590</i> | 3.64  | $3 \times 10^{-4}$ |
| Weaning | <i>Loc110257905</i> | 3.57  | $5 \times 10^{-4}$ |
| Weaning | <i>Loc100624149</i> | 2.53  | $9 \times 10^{-4}$ |
| Weaning | <i>Loc110255320</i> | 3.18  | $4 \times 10^{-2}$ |
| MIA     | <i>Loc396781</i>    | -7.49 | $6 \times 10^{-8}$ |
| MIA     | <i>Gabraq</i>       | 6.64  | $5 \times 10^{-8}$ |
| MIA     | <i>Loc100038329</i> | -5.61 | $9 \times 10^{-8}$ |
| MIA     | <i>Slc17a7</i>      | -5.15 | $3 \times 10^{-8}$ |



|     |                     |       |                    |
|-----|---------------------|-------|--------------------|
| MIA | <i>Loc100125542</i> | -4.52 | $2 \times 10^{-8}$ |
| MIA | <i>Loc100152327</i> | -4.40 | $3 \times 10^{-8}$ |
| MIA | <i>Loc110258704</i> | -5.01 | $4 \times 10^{-8}$ |
| MIA | <i>Slc5a5</i>       | 4.68  | $4 \times 10^{-8}$ |
| MIA | <i>C14h10orf105</i> | 4.44  | $3 \times 10^{-8}$ |
| MIA | <i>Loc102167964</i> | -4.28 | $7 \times 10^{-8}$ |
| MIA | <i>Gal</i>          | 4.17  | $8 \times 10^{-8}$ |
| MIA | <i>Ecel1</i>        | 4.04  | $3 \times 10^{-8}$ |
| MIA | <i>Marco</i>        | -4.42 | $5 \times 10^{-8}$ |
| MIA | <i>Rasgrp1</i>      | -3.76 | $1 \times 10^{-8}$ |
| MIA | <i>Neurod2</i>      | -3.76 | $4 \times 10^{-8}$ |
| MIA | <i>Agrp</i>         | 4.18  | $7 \times 10^{-8}$ |
| MIA | <i>Foxg1</i>        | -3.70 | $2 \times 10^{-8}$ |
| MIA | <i>Nkx6-1</i>       | 3.90  | $3 \times 10^{-8}$ |
| MIA | <i>Loc110258326</i> | -4.39 | $3 \times 10^{-8}$ |
| MIA | <i>Loc110259983</i> | -3.92 | $2 \times 10^{-8}$ |
| MIA | <i>Agt</i>          | 3.53  | $5 \times 10^{-8}$ |
| MIA | <i>Ddn</i>          | -3.36 | $6 \times 10^{-8}$ |
| MIA | <i>Klrk1</i>        | -3.69 | $2 \times 10^{-8}$ |
| MIA | <i>Pdyn</i>         | 3.36  | $2 \times 10^{-8}$ |
| MIA | <i>F5</i>           | -3.19 | $2 \times 10^{-8}$ |
| MIA | <i>Calb2</i>        | 3.32  | $5 \times 10^{-8}$ |
| MIA | <i>Sult1a3</i>      | 3.29  | $1 \times 10^{-8}$ |
| MIA | <i>Col2a1</i>       | 3.24  | $2 \times 10^{-8}$ |
| MIA | <i>Gfra3</i>        | 3.26  | $2 \times 10^{-8}$ |
| MIA | <i>Grin2a</i>       | -3.07 | $6 \times 10^{-8}$ |
| MIA | <i>Unc13c</i>       | -3.03 | $9 \times 10^{-8}$ |
| MIA | <i>Gfap</i>         | 3.13  | $1 \times 10^{-8}$ |
| MIA | <i>Comp</i>         | 3.38  | $1 \times 10^{-8}$ |
| MIA | <i>Cd3e</i>         | -3.38 | $1 \times 10^{-8}$ |
| MIA | <i>Slc22a2</i>      | 3.34  | $1 \times 10^{-8}$ |
| MIA | <i>Mpped1</i>       | -2.98 | $2 \times 10^{-8}$ |
| MIA | <i>Camk2a</i>       | -2.95 | $3 \times 10^{-8}$ |
| MIA | <i>Tmem155</i>      | -3.09 | $4 \times 10^{-8}$ |
| MIA | <i>Cabp1</i>        | -2.85 | $3 \times 10^{-8}$ |
| MIA | <i>Cd6</i>          | -3.68 | $6 \times 10^{-8}$ |
| MIA | <i>Cd3g</i>         | -3.38 | $6 \times 10^{-8}$ |
| MIA | <i>Entpd2</i>       | 2.95  | $8 \times 10^{-8}$ |
| MIA | <i>Loc100623670</i> | -3.38 | $8 \times 10^{-8}$ |
| MIA | <i>Zic1</i>         | 2.89  | $1 \times 10^{-8}$ |

|     |                     |       |                    |
|-----|---------------------|-------|--------------------|
| MIA | <i>Rflnb</i>        | 2.85  | $2 \times 10^{-8}$ |
| MIA | <i>Tac1</i>         | 2.87  | $2 \times 10^{-8}$ |
| MIA | <i>Cbln1</i>        | 2.91  | $3 \times 10^{-8}$ |
| MIA | <i>Osr1</i>         | 2.89  | $5 \times 10^{-8}$ |
| MIA | <i>Kctd4</i>        | 2.89  | $5 \times 10^{-8}$ |
| MIA | <i>Lck</i>          | -2.92 | $5 \times 10^{-8}$ |
| MIA | <i>Prss56</i>       | 2.82  | $6 \times 10^{-8}$ |
| MIA | <i>Nrgn</i>         | -2.65 | $1 \times 10^{-8}$ |
| MIA | <i>Cd3d</i>         | -3.29 | $1 \times 10^{-8}$ |
| MIA | <i>Itk</i>          | -3.21 | $1 \times 10^{-8}$ |
| MIA | <i>Tpo</i>          | 2.79  | $1 \times 10^{-8}$ |
| MIA | <i>Adgre1</i>       | -3.28 | $1 \times 10^{-8}$ |
| MIA | <i>Hapln2</i>       | 2.73  | $2 \times 10^{-8}$ |
| MIA | <i>Loc100620470</i> | -2.63 | $2 \times 10^{-8}$ |
| MIA | <i>Adcy1</i>        | -2.59 | $3 \times 10^{-8}$ |
| MIA | <i>Cxcr6</i>        | -3.62 | $3 \times 10^{-8}$ |
| MIA | <i>Fndc9</i>        | 2.74  | $3 \times 10^{-8}$ |
| MIA | <i>Loc110257701</i> | 2.87  | $5 \times 10^{-8}$ |
| MIA | <i>Loc110261683</i> | 2.68  | $5 \times 10^{-8}$ |
| MIA | <i>Ccl5</i>         | -2.60 | $7 \times 10^{-8}$ |
| MIA | <i>Sfrp5</i>        | 2.70  | $9 \times 10^{-8}$ |
| MIA | <i>Slc1a2</i>       | -2.52 | $9 \times 10^{-8}$ |
| MIA | <i>Lhx5</i>         | 2.76  | $1 \times 10^{-8}$ |
| MIA | <i>Loc110257816</i> | 2.69  | $1 \times 10^{-8}$ |
| MIA | <i>Loc100621559</i> | -2.85 | $1 \times 10^{-8}$ |
| MIA | <i>Klrd1</i>        | -2.85 | $2 \times 10^{-8}$ |
| MIA | <i>Cpxm2</i>        | 2.58  | $2 \times 10^{-8}$ |
| MIA | <i>Fezf1</i>        | 2.61  | $3 \times 10^{-8}$ |
| MIA | <i>Gzma</i>         | -2.86 | $3 \times 10^{-8}$ |
| MIA | <i>Cd8b</i>         | -3.27 | $3 \times 10^{-8}$ |
| MIA | <i>Lrrn4cl</i>      | 2.57  | $3 \times 10^{-8}$ |
| MIA | <i>Gpr50</i>        | 2.83  | $4 \times 10^{-8}$ |
| MIA | <i>Hdc</i>          | 2.67  | $4 \times 10^{-8}$ |
| MIA | <i>Loc100038328</i> | -3.54 | $5 \times 10^{-8}$ |
| MIA | <i>Cnmd</i>         | 2.55  | $5 \times 10^{-8}$ |
| MIA | <i>T</i>            | 2.78  | $7 \times 10^{-8}$ |
| MIA | <i>Slc18a2</i>      | 2.54  | $1 \times 10^{-8}$ |
| MIA | <i>Loc106505443</i> | 3.25  | $1 \times 10^{-8}$ |
| MIA | <i>Loc100519314</i> | -2.65 | $2 \times 10^{-8}$ |
| MIA | <i>Sit1</i>         | -2.78 | $2 \times 10^{-8}$ |

|     |                     |       |                    |
|-----|---------------------|-------|--------------------|
| MIA | <i>Prf1</i>         | -2.74 | $3 \times 10^{-8}$ |
| MIA | <i>Odf3b</i>        | 2.56  | $3 \times 10^{-8}$ |
| MIA | <i>Eomes</i>        | -2.61 | $3 \times 10^{-8}$ |
| MIA | <i>Gzmk</i>         | -2.66 | $6 \times 10^{-8}$ |
| MIA | <i>Cd244</i>        | -2.74 | $2 \times 10^{-8}$ |
| MIA | <i>Npw</i>          | 2.55  | $4 \times 10^{-8}$ |
| MIA | <i>Loc100620198</i> | -2.55 | $6 \times 10^{-8}$ |
| MIA | <i>Loc110258827</i> | -2.97 | $1 \times 10^{-7}$ |
| MIA | <i>Msmg</i>         | 2.89  | $3 \times 10^{-7}$ |
| MIA | <i>Loc100518860</i> | -2.73 | $3 \times 10^{-6}$ |
| MIA | <i>Loc110258673</i> | -2.68 | $3 \times 10^{-6}$ |
| Sex | <i>Loc100624149</i> | 12.14 | $3 \times 10^{-8}$ |
| Sex | <i>Loc100624590</i> | 13.44 | $7 \times 10^{-8}$ |
| Sex | <i>Loc110257905</i> | 13.17 | $7 \times 10^{-8}$ |
| Sex | <i>Eif1ay</i>       | 13.91 | $1 \times 10^{-8}$ |
| Sex | <i>Loc100625207</i> | 10.32 | $6 \times 10^{-8}$ |
| Sex | <i>Loc110255320</i> | 12.15 | $1 \times 10^{-8}$ |
| Sex | <i>Loc110257883</i> | 12.15 | $1 \times 10^{-8}$ |
| Sex | <i>Hapln2</i>       | -8.55 | $5 \times 10^{-8}$ |
| Sex | <i>Loc110255257</i> | 10.53 | $1 \times 10^{-8}$ |
| Sex | <i>Gjb1</i>         | -8.77 | $3 \times 10^{-8}$ |
| Sex | <i>Mobp</i>         | -7.91 | $3 \times 10^{-8}$ |
| Sex | <i>Mbp</i>          | -7.90 | $3 \times 10^{-8}$ |
| Sex | <i>Plp1</i>         | -7.80 | $5 \times 10^{-8}$ |
| Sex | <i>Ernn</i>         | -7.74 | $2 \times 10^{-8}$ |
| Sex | <i>Gfap</i>         | -7.24 | $2 \times 10^{-8}$ |
| Sex | <i>Mog</i>          | -7.39 | $2 \times 10^{-8}$ |
| Sex | <i>Sst</i>          | -7.49 | $7 \times 10^{-8}$ |
| Sex | <i>Mal</i>          | -7.04 | $4 \times 10^{-8}$ |
| Sex | <i>Loc110257896</i> | 9.18  | $1 \times 10^{-8}$ |
| Sex | <i>Mag</i>          | -6.61 | $1 \times 10^{-8}$ |
| Sex | <i>Ugt8</i>         | -6.57 | $3 \times 10^{-8}$ |
| Sex | <i>Mlc1</i>         | -6.44 | $2 \times 10^{-8}$ |
| Sex | <i>Gjc2</i>         | -6.43 | $3 \times 10^{-8}$ |
| Sex | <i>Loc110261683</i> | -6.58 | $5 \times 10^{-8}$ |
| Sex | <i>Fa2h</i>         | -6.32 | $6 \times 10^{-8}$ |
| Sex | <i>Tf</i>           | -6.24 | $1 \times 10^{-8}$ |
| Sex | <i>Slc14a1</i>      | -6.45 | $6 \times 10^{-8}$ |
| Sex | <i>Loc110257894</i> | 6.66  | $3 \times 10^{-8}$ |
| Sex | <i>Grin1</i>        | -6.04 | $1 \times 10^{-8}$ |

|     |                     |       |                    |
|-----|---------------------|-------|--------------------|
| Sex | <i>Camkv</i>        | -6.10 | $3 \times 10^{-8}$ |
| Sex | <i>Grm3</i>         | -6.43 | $6 \times 10^{-8}$ |
| Sex | <i>Cmtm5</i>        | -6.06 | $1 \times 10^{-8}$ |
| Sex | <i>Sgk2</i>         | -5.87 | $4 \times 10^{-8}$ |
| Sex | <i>Loc100624329</i> | 5.73  | $3 \times 10^{-8}$ |
| Sex | <i>Gpr3711</i>      | -5.52 | $3 \times 10^{-8}$ |
| Sex | <i>Pou3f3</i>       | -5.65 | $2 \times 10^{-8}$ |
| Sex | <i>Nkx6-2</i>       | -5.60 | $4 \times 10^{-8}$ |
| Sex | <i>Tubb4a</i>       | -5.37 | $1 \times 10^{-8}$ |
| Sex | <i>Ttyh1</i>        | -5.40 | $2 \times 10^{-8}$ |
| Sex | <i>Calb2</i>        | -5.40 | $4 \times 10^{-8}$ |
| Sex | <i>Atp10b</i>       | -5.42 | $8 \times 10^{-8}$ |
| Sex | <i>Cpne6</i>        | -5.36 | $9 \times 10^{-8}$ |
| Sex | <i>Tmem88b</i>      | -5.32 | $1 \times 10^{-8}$ |
| Sex | <i>Olig1</i>        | -5.17 | $2 \times 10^{-8}$ |
| Sex | <i>Sox10</i>        | -5.13 | $9 \times 10^{-8}$ |
| Sex | <i>Sh3tc2</i>       | -5.24 | $4 \times 10^{-8}$ |
| Sex | <i>Fabp7</i>        | -5.07 | $5 \times 10^{-8}$ |
| Sex | <i>Adamts4</i>      | -5.05 | $2 \times 10^{-8}$ |
| Sex | <i>Sox21</i>        | -5.33 | $6 \times 10^{-8}$ |
| Sex | <i>Opalin</i>       | -4.96 | $6 \times 10^{-8}$ |
| Sex | <i>Elfn2</i>        | -4.97 | $8 \times 10^{-8}$ |
| Sex | <i>Col11a2</i>      | -4.96 | $3 \times 10^{-8}$ |
| Sex | <i>Cbln1</i>        | -5.22 | $4 \times 10^{-8}$ |
| Sex | <i>Loc396706</i>    | 8.67  | $8 \times 10^{-8}$ |
| Sex | <i>Bcan</i>         | -4.84 | $1 \times 10^{-8}$ |
| Sex | <i>Slc1a3</i>       | -4.81 | $2 \times 10^{-8}$ |
| Sex | <i>Slc6a7</i>       | -4.90 | $4 \times 10^{-8}$ |
| Sex | <i>Nkx6-1</i>       | -4.97 | $4 \times 10^{-8}$ |
| Sex | <i>Gabrq</i>        | -4.92 | $2 \times 10^{-8}$ |
| Sex | <i>Pdyn</i>         | -4.75 | $2 \times 10^{-8}$ |
| Sex | <i>Plxnb3</i>       | -4.73 | $3 \times 10^{-8}$ |
| Sex | <i>Kcnj10</i>       | -4.69 | $5 \times 10^{-8}$ |
| Sex | <i>Zic5</i>         | -5.00 | $6 \times 10^{-8}$ |
| Sex | <i>Ndp</i>          | -4.78 | $2 \times 10^{-8}$ |
| Sex | <i>Olig2</i>        | -4.65 | $3 \times 10^{-8}$ |
| Sex | <i>Npy</i>          | -4.78 | $4 \times 10^{-8}$ |
| Sex | <i>Evi2a</i>        | -4.66 | $8 \times 10^{-8}$ |
| Sex | <i>Synpo2l</i>      | -4.67 | $1 \times 10^{-8}$ |
| Sex | <i>Zic1</i>         | -4.64 | $1 \times 10^{-8}$ |

|     |                     |       |                    |
|-----|---------------------|-------|--------------------|
| Sex | <i>Snx22</i>        | -4.57 | $1 \times 10^{-8}$ |
| Sex | <i>Rab7b</i>        | -4.64 | $2 \times 10^{-8}$ |
| Sex | <i>Th</i>           | -4.94 | $3 \times 10^{-8}$ |
| Sex | <i>Fam135b</i>      | -4.63 | $4 \times 10^{-8}$ |
| Sex | <i>Agt</i>          | -4.48 | $6 \times 10^{-8}$ |
| Sex | <i>Efh1</i>         | -4.48 | $1 \times 10^{-8}$ |
| Sex | <i>Gpr17</i>        | -4.42 | $4 \times 10^{-8}$ |
| Sex | <i>Paqr6</i>        | -4.41 | $4 \times 10^{-8}$ |
| Sex | <i>C14h10orf90</i>  | -4.48 | $3 \times 10^{-8}$ |
| Sex | <i>C14h10orf105</i> | -4.37 | $7 \times 10^{-8}$ |
| Sex | <i>Kcnp1</i>        | -4.43 | $7 \times 10^{-8}$ |
| Sex | <i>Kctd4</i>        | -4.52 | $1 \times 10^{-8}$ |
| Sex | <i>Nptx1</i>        | -4.37 | $1 \times 10^{-8}$ |
| Sex | <i>Zdhhc22</i>      | -4.44 | $2 \times 10^{-8}$ |
| Sex | <i>Ppp1r14a</i>     | -4.24 | $3 \times 10^{-8}$ |
| Sex | <i>Gal</i>          | -4.29 | $4 \times 10^{-8}$ |
| Sex | <i>Igsf21</i>       | -4.50 | $4 \times 10^{-8}$ |
| Sex | <i>Gad1</i>         | -4.27 | $6 \times 10^{-8}$ |
| Sex | <i>Alox15</i>       | 4.19  | $9 \times 10^{-8}$ |
| Sex | <i>Cbln4</i>        | -4.39 | $4 \times 10^{-8}$ |
| Sex | <i>Comp</i>         | -4.53 | $8 \times 10^{-8}$ |
| Sex | <i>Slc6a1</i>       | -4.12 | $1 \times 10^{-8}$ |
| Sex | <i>Slc5a11</i>      | -4.19 | $1 \times 10^{-8}$ |
| Sex | <i>Grid1</i>        | -4.17 | $1 \times 10^{-8}$ |
| Sex | <i>Adap1</i>        | -4.08 | $2 \times 10^{-8}$ |
| Sex | <i>Ache</i>         | -4.05 | $5 \times 10^{-8}$ |
| Sex | <i>Shisa9</i>       | -4.15 | $5 \times 10^{-8}$ |
| Sex | <i>Vsnl1</i>        | -4.04 | $6 \times 10^{-8}$ |
| Sex | <i>Ca14</i>         | -4.13 | $7 \times 10^{-8}$ |
| Sex | <i>Fndc9</i>        | -4.12 | $9 \times 10^{-8}$ |
| Sex | <i>Loc110255851</i> | -4.12 | $3 \times 10^{-8}$ |
| Sex | <i>Irx1</i>         | -4.34 | $5 \times 10^{-8}$ |
| Sex | <i>Flt3</i>         | -4.11 | $6 \times 10^{-8}$ |
| Sex | <i>Slc16a4</i>      | -4.10 | $6 \times 10^{-8}$ |
| Sex | <i>Aqp4</i>         | -3.89 | $1 \times 10^{-8}$ |
| Sex | <i>Acan</i>         | -4.17 | $5 \times 10^{-8}$ |
| Sex | <i>S1pr5</i>        | -3.88 | $7 \times 10^{-8}$ |
| Sex | <i>Slc1a6</i>       | -3.88 | $2 \times 10^{-8}$ |
| Sex | <i>Loc100511183</i> | -3.85 | $2 \times 10^{-8}$ |
| Sex | <i>Apod</i>         | -3.76 | $2 \times 10^{-8}$ |

|     |                     |       |                    |
|-----|---------------------|-------|--------------------|
| Sex | <i>Cldn11</i>       | -3.75 | $3 \times 10^{-8}$ |
| Sex | <i>C4h8orf46</i>    | -3.75 | $6 \times 10^{-8}$ |
| Sex | <i>Loc106510131</i> | -3.74 | $6 \times 10^{-8}$ |
| Sex | <i>Slc4a10</i>      | -3.82 | $7 \times 10^{-8}$ |
| Sex | <i>Wnt7b</i>        | -3.80 | $9 \times 10^{-8}$ |
| Sex | <i>Nkd1</i>         | -3.72 | $1 \times 10^{-8}$ |
| Sex | <i>Apoe</i>         | -3.66 | $3 \times 10^{-8}$ |
| Sex | <i>Gal3st1</i>      | -3.66 | $5 \times 10^{-8}$ |
| Sex | <i>Loc110257910</i> | 7.31  | $6 \times 10^{-8}$ |
| Sex | <i>Pdlim4</i>       | -3.67 | $2 \times 10^{-8}$ |
| Sex | <i>Plip</i>         | -3.58 | $2 \times 10^{-8}$ |
| Sex | <i>Draxin</i>       | -3.65 | $5 \times 10^{-8}$ |
| Sex | <i>Agrp</i>         | -3.70 | $5 \times 10^{-8}$ |
| Sex | <i>Zic2</i>         | -3.58 | $6 \times 10^{-8}$ |
| Sex | <i>Cldn10</i>       | -3.56 | $2 \times 10^{-8}$ |
| Sex | <i>Myrf</i>         | -3.47 | $2 \times 10^{-8}$ |
| Sex | <i>Mgat5b</i>       | -3.57 | $4 \times 10^{-8}$ |
| Sex | <i>Tmem132e</i>     | -3.53 | $8 \times 10^{-8}$ |
| Sex | <i>Kcna1</i>        | -3.42 | $1 \times 10^{-8}$ |
| Sex | <i>Hepacam</i>      | -3.39 | $1 \times 10^{-8}$ |
| Sex | <i>Cldn19</i>       | -4.25 | $2 \times 10^{-8}$ |
| Sex | <i>Sdcbp2</i>       | -3.47 | $2 \times 10^{-8}$ |
| Sex | <i>Loc110256043</i> | -3.40 | $3 \times 10^{-8}$ |
| Sex | <i>Otp</i>          | -3.73 | $4 \times 10^{-8}$ |
| Sex | <i>Fez1</i>         | -3.34 | $5 \times 10^{-8}$ |
| Sex | <i>Gdf1</i>         | -3.33 | $5 \times 10^{-8}$ |
| Sex | <i>Smoc1</i>        | -3.34 | $6 \times 10^{-8}$ |
| Sex | <i>Rab33a</i>       | -3.38 | $6 \times 10^{-8}$ |
| Sex | <i>Slc1a2</i>       | -3.31 | $8 \times 10^{-8}$ |
| Sex | <i>Fam131b</i>      | -3.34 | $8 \times 10^{-8}$ |
| Sex | <i>Cacna2d3</i>     | -3.38 | $1 \times 10^{-8}$ |
| Sex | <i>Neu4</i>         | -3.33 | $1 \times 10^{-8}$ |
| Sex | <i>Rasgrf1</i>      | -3.35 | $1 \times 10^{-8}$ |
| Sex | <i>Lcat</i>         | -3.41 | $1 \times 10^{-8}$ |
| Sex | <i>C1ql3</i>        | -3.33 | $2 \times 10^{-8}$ |
| Sex | <i>Fndc10</i>       | -3.26 | $8 \times 10^{-8}$ |
| Sex | <i>Slc5a5</i>       | -3.25 | $1 \times 10^{-8}$ |
| Sex | <i>Nxph1</i>        | -3.29 | $1 \times 10^{-8}$ |
| Sex | <i>Cnp</i>          | -3.17 | $2 \times 10^{-8}$ |
| Sex | <i>Arhgdig</i>      | -3.21 | $2 \times 10^{-8}$ |

|     |                     |       |                    |
|-----|---------------------|-------|--------------------|
| Sex | <i>Notum</i>        | -3.24 | $2 \times 10^{-8}$ |
| Sex | <i>Dthd1</i>        | -3.29 | $3 \times 10^{-8}$ |
| Sex | <i>Osr1</i>         | -3.22 | $4 \times 10^{-8}$ |
| Sex | <i>Rgs14</i>        | -3.22 | $4 \times 10^{-8}$ |
| Sex | <i>Fabp3</i>        | -3.14 | $6 \times 10^{-8}$ |
| Sex | <i>B4galnt1</i>     | -3.13 | $7 \times 10^{-8}$ |
| Sex | <i>Omg</i>          | -3.11 | $8 \times 10^{-8}$ |
| Sex | <i>Atp13a4</i>      | -3.19 | $8 \times 10^{-8}$ |
| Sex | <i>Pla2r1</i>       | -3.12 | $8 \times 10^{-8}$ |
| Sex | <i>Chn2</i>         | -3.11 | $1 \times 10^{-8}$ |
| Sex | <i>Lgi4</i>         | -3.05 | $3 \times 10^{-8}$ |
| Sex | <i>Gla2</i>         | -3.09 | $5 \times 10^{-8}$ |
| Sex | <i>Stmn4</i>        | -2.99 | $9 \times 10^{-8}$ |
| Sex | <i>Ada</i>          | -3.03 | $9 \times 10^{-8}$ |
| Sex | <i>Csmd1</i>        | -3.01 | $1 \times 10^{-8}$ |
| Sex | <i>Cers1</i>        | -2.95 | $2 \times 10^{-8}$ |
| Sex | <i>Sphk1</i>        | 2.93  | $3 \times 10^{-8}$ |
| Sex | <i>Rarres1</i>      | -2.91 | $4 \times 10^{-8}$ |
| Sex | <i>Loc110257598</i> | -2.99 | $4 \times 10^{-8}$ |
| Sex | <i>Gpr37</i>        | -2.91 | $5 \times 10^{-8}$ |
| Sex | <i>Map6d1</i>       | -2.91 | $6 \times 10^{-8}$ |
| Sex | <i>Loc110257903</i> | -3.59 | $6 \times 10^{-8}$ |
| Sex | <i>Asic2</i>        | -2.92 | $7 \times 10^{-8}$ |
| Sex | <i>Sult1a3</i>      | -2.91 | $7 \times 10^{-8}$ |
| Sex | <i>Homer3</i>       | -2.89 | $7 \times 10^{-8}$ |
| Sex | <i>Aspa</i>         | -2.99 | $8 \times 10^{-8}$ |
| Sex | <i>Ngb</i>          | -2.92 | $2 \times 10^{-8}$ |
| Sex | <i>Loc100524517</i> | -2.97 | $2 \times 10^{-8}$ |
| Sex | <i>Tac1</i>         | -2.86 | $2 \times 10^{-8}$ |
| Sex | <i>Emilin2</i>      | -2.85 | $3 \times 10^{-8}$ |
| Sex | <i>Shmt1</i>        | -2.84 | $3 \times 10^{-8}$ |
| Sex | <i>Pla1a</i>        | -2.98 | $3 \times 10^{-8}$ |
| Sex | <i>Phyhip</i>       | -2.84 | $3 \times 10^{-8}$ |
| Sex | <i>Ncan</i>         | -2.82 | $3 \times 10^{-8}$ |
| Sex | <i>Slitrk3</i>      | -2.95 | $4 \times 10^{-8}$ |
| Sex | <i>Hs6st3</i>       | -2.86 | $6 \times 10^{-8}$ |
| Sex | <i>Gabra3</i>       | -2.80 | $6 \times 10^{-8}$ |
| Sex | <i>Lrrc71</i>       | -2.84 | $9 \times 10^{-8}$ |
| Sex | <i>Erbp3</i>        | -2.77 | $9 \times 10^{-8}$ |
| Sex | <i>Adcyap1r1</i>    | -2.76 | $1 \times 10^{-8}$ |

|     |                     |       |                    |
|-----|---------------------|-------|--------------------|
| Sex | <i>Cacng4</i>       | -2.78 | $1 \times 10^{-8}$ |
| Sex | <i>Apln</i>         | -2.77 | $1 \times 10^{-8}$ |
| Sex | <i>Nr2f1</i>        | -2.75 | $1 \times 10^{-8}$ |
| Sex | <i>Prima1</i>       | -2.77 | $1 \times 10^{-8}$ |
| Sex | <i>Cpxm2</i>        | -2.75 | $1 \times 10^{-8}$ |
| Sex | <i>Cp</i>           | -2.78 | $1 \times 10^{-8}$ |
| Sex | <i>S100a1</i>       | -2.73 | $2 \times 10^{-8}$ |
| Sex | <i>Ido1</i>         | -2.90 | $2 \times 10^{-8}$ |
| Sex | <i>Cnmd</i>         | -2.75 | $2 \times 10^{-8}$ |
| Sex | <i>Ltc4s</i>        | -2.84 | $3 \times 10^{-8}$ |
| Sex | <i>Tmem196</i>      | -2.85 | $4 \times 10^{-8}$ |
| Sex | <i>Entpd2</i>       | -2.72 | $4 \times 10^{-8}$ |
| Sex | <i>Sema7a</i>       | -2.69 | $5 \times 10^{-8}$ |
| Sex | <i>Zeb2</i>         | -2.68 | $5 \times 10^{-8}$ |
| Sex | <i>Prr18</i>        | -2.67 | $7 \times 10^{-8}$ |
| Sex | <i>Flvcr2</i>       | -2.70 | $2 \times 10^{-8}$ |
| Sex | <i>Gjb6</i>         | -2.67 | $2 \times 10^{-8}$ |
| Sex | <i>Acsbg1</i>       | -2.60 | $3 \times 10^{-8}$ |
| Sex | <i>Fgfr3</i>        | -2.60 | $3 \times 10^{-8}$ |
| Sex | <i>Kcna6</i>        | -2.59 | $3 \times 10^{-8}$ |
| Sex | <i>Gjb2</i>         | -2.71 | $4 \times 10^{-8}$ |
| Sex | <i>Daam2</i>        | -2.57 | $5 \times 10^{-8}$ |
| Sex | <i>Dact2</i>        | -2.73 | $5 \times 10^{-8}$ |
| Sex | <i>Fgfr4</i>        | -2.65 | $5 \times 10^{-8}$ |
| Sex | <i>Tmem144</i>      | -2.57 | $5 \times 10^{-8}$ |
| Sex | <i>Ramp3</i>        | -2.56 | $6 \times 10^{-8}$ |
| Sex | <i>Crsp-2</i>       | -2.59 | $6 \times 10^{-8}$ |
| Sex | <i>Loc100157711</i> | -2.63 | $8 \times 10^{-8}$ |
| Sex | <i>Tbx1</i>         | -2.71 | $1 \times 10^{-8}$ |
| Sex | <i>Ecel1</i>        | -2.52 | $1 \times 10^{-8}$ |
| Sex | <i>Fam159b</i>      | -2.60 | $1 \times 10^{-8}$ |
| Sex | <i>Sirt2</i>        | -2.52 | $1 \times 10^{-8}$ |
| Sex | <i>Cfb</i>          | -2.52 | $2 \times 10^{-8}$ |
| Sex | <i>Nrxn3</i>        | -2.54 | $2 \times 10^{-8}$ |
| Sex | <i>Dnajib13</i>     | -2.56 | $3 \times 10^{-8}$ |
| Sex | <i>Loc100524923</i> | -2.52 | $3 \times 10^{-8}$ |
| Sex | <i>Loc110255218</i> | -2.55 | $3 \times 10^{-8}$ |
| Sex | <i>Loc100512593</i> | -2.56 | $3 \times 10^{-8}$ |
| Sex | <i>Gabra4</i>       | -2.50 | $4 \times 10^{-8}$ |
| Sex | <i>Gtsf1</i>        | 2.63  | $5 \times 10^{-8}$ |



|     |                     |       |                    |
|-----|---------------------|-------|--------------------|
| Sex | <i>Loc110257199</i> | -2.58 | $6 \times 10^{-8}$ |
| Sex | <i>Otos</i>         | -2.52 | $7 \times 10^{-8}$ |

<sup>1</sup> LogFC > 0 (LogFC < 0) denotes (for main and interaction effects) gene over-expression (under-expression) in control relative to MIA-exposed pigs, pigs exposed to weaning stress relative to not stressed (nursed), and males relative to females.

**Supplemental Table S2.** Gene Ontology biological processes and Kyoto Encyclopedia of Genes and Genomes pathways enriched (normalized enrichment score NES or ratio > 1.6, False Discovery Rate (FDR) adjusted  $p$ -value < 0.05) identified by Gene Set Enrichment Analysis (GSEA) and by Over-representation Analysis (ORA using genes with FDR  $p$ -value < 0.05) for the interactions and main effects of maternal immune activation (MIA), weaning, and sex in pituitary gland.

#### Gene Set Enrichment Analysis (GSEA)

| Category                                               | Sex  |                    | Weaning |                    | MIA |                    | MIA x Sex |                    | Weaning x Sex |                    | Weaning x MIA |                    |
|--------------------------------------------------------|------|--------------------|---------|--------------------|-----|--------------------|-----------|--------------------|---------------|--------------------|---------------|--------------------|
|                                                        | NES  | FDR <sup>3</sup>   | NES     | FDR                | NES | FDR                | NES       | FDR                | NES           | FDR                | NES           | FDR                |
| GO Biological Process <sup>1</sup>                     |      |                    |         |                    |     |                    |           |                    |               |                    |               |                    |
| GO:0007272 ensheathment of neurons                     | -1.8 | $2 \times 10^{-8}$ |         |                    | 1.6 | $4 \times 10^{-2}$ | 1.8       | $5 \times 10^{-3}$ |               |                    | -2.2          | $2 \times 10^{-8}$ |
| GO:0031099 regeneration                                | -1.7 | $1 \times 10^{-2}$ |         |                    | 1.6 | $4 \times 10^{-2}$ | 1.7       | $3 \times 10^{-2}$ |               |                    |               |                    |
| GO:0007059 chromosome segregation                      |      |                    | -2.0    | $1 \times 10^{-3}$ |     |                    |           |                    |               |                    |               |                    |
| GO:0007218 neuropeptide signaling pathway              |      |                    | -2.0    | $3 \times 10^{-3}$ | 1.8 | $2 \times 10^{-2}$ |           |                    | 2.0           | $5 \times 10^{-3}$ | 1.8           | $2 \times 10^{-2}$ |
| GO:0048285 organelle fission                           |      |                    | -2.0    | $3 \times 10^{-3}$ |     |                    |           |                    |               |                    |               |                    |
| GO:0050803 regulation of synapse structure or activity |      |                    | -1.8    | $2 \times 10^{-2}$ |     |                    |           |                    |               |                    |               |                    |
| GO:0043062 extracellular structure organization        |      |                    |         |                    | 2.0 | $2 \times 10^{-8}$ | 1.7       | $3 \times 10^{-2}$ |               |                    |               |                    |
| GO:0001503 ossification                                |      |                    |         |                    | 2.0 | $5 \times 10^{-3}$ |           |                    |               |                    |               |                    |
| GO:0042303 molting cycle                               |      |                    |         |                    | 1.8 | $1 \times 10^{-2}$ |           |                    | -2.0          | $8 \times 10^{-3}$ | 2.0           | $2 \times 10^{-2}$ |
| GO:0060485 mesenchyme development                      |      |                    |         |                    | 1.8 | $1 \times 10^{-2}$ |           |                    |               |                    |               |                    |
| GO:0061458 reproductive system development             |      |                    |         |                    | 1.8 | $2 \times 10^{-2}$ |           |                    |               |                    | 1.7           | $4 \times 10^{-2}$ |
| GO:0008544 epidermis development                       |      |                    |         |                    | 1.7 | $2 \times 10^{-2}$ |           |                    |               |                    | 2.0           | $3 \times 10^{-2}$ |
| GO:0043588 skin development                            |      |                    |         |                    | 1.8 | $2 \times 10^{-2}$ |           |                    |               |                    | 2.0           | $2 \times 10^{-2}$ |
| GO:0001501 skeletal system development                 |      |                    |         |                    | 1.7 | $2 \times 10^{-2}$ |           |                    |               |                    |               |                    |
| GO:0055123 digestive system development                |      |                    |         |                    | 1.7 | $2 \times 10^{-2}$ |           |                    |               |                    |               |                    |
| GO:0001763 morphogenesis of a branching structure      |      |                    |         |                    | 1.8 | $2 \times 10^{-2}$ |           |                    | -2.0          | $1 \times 10^{-2}$ |               |                    |
| GO:0001655 urogenital system development               |      |                    |         |                    | 1.7 | $3 \times 10^{-2}$ |           |                    |               |                    |               |                    |
| GO:0007389 pattern specification process               |      |                    |         |                    | 1.7 | $3 \times 10^{-2}$ |           |                    |               |                    | 2.0           | $2 \times 10^{-2}$ |
| GO:0048880 sensory system development                  |      |                    |         |                    | 1.7 | $4 \times 10^{-2}$ |           |                    |               |                    |               |                    |

|                            |                                           |      |                    |      |                    |      |                    |                    |
|----------------------------|-------------------------------------------|------|--------------------|------|--------------------|------|--------------------|--------------------|
| GO:0048736                 | appendage development                     |      |                    | 1.6  | $4 \times 10^{-2}$ |      |                    |                    |
| GO:0061448                 | connective tissue development             |      |                    | 1.7  | $4 \times 10^{-2}$ |      |                    |                    |
| GO:0031214                 | biomineral tissue development             |      |                    | 1.6  | $4 \times 10^{-2}$ |      |                    |                    |
| GO:0031016                 | pancreas development                      |      |                    | 1.6  | $4 \times 10^{-2}$ |      |                    |                    |
| GO:0046683                 | response to organophosphorus              |      |                    | 1.6  | $4 \times 10^{-2}$ |      | 2.0                | $3 \times 10^{-2}$ |
| GO:0060541                 | respiratory system development            |      |                    | 1.6  | $5 \times 10^{-2}$ |      | 1.8                | $3 \times 10^{-2}$ |
| GO:0044282                 | small molecule catabolic process          |      |                    | 1.6  | $5 \times 10^{-2}$ |      |                    |                    |
| GO:0021675                 | nerve development                         |      |                    |      |                    | -1.8 | $3 \times 10^{-2}$ |                    |
| GO:0048732                 | gland development                         |      |                    |      |                    |      | -2.0               | $3 \times 10^{-2}$ |
| GO:0070661                 | leukocyte proliferation                   |      |                    |      |                    |      | 1.8                | $2 \times 10^{-2}$ |
| GO:0007492                 | endoderm development                      |      |                    |      |                    |      | 1.8                | $2 \times 10^{-2}$ |
| GO:0072376                 | protein activation cascade                |      |                    |      |                    |      | 1.8                | $3 \times 10^{-2}$ |
| GO:0019932                 | second-messenger-mediated signaling       |      |                    |      |                    |      | 1.7                | $5 \times 10^{-2}$ |
| KEGG Pathways <sup>2</sup> |                                           |      |                    |      |                    |      |                    |                    |
| ssc05033                   | Nicotine addiction                        | -1.8 | $9 \times 10^{-3}$ | -2.1 | $2 \times 10^{-8}$ |      | 2.0                | $3 \times 10^{-3}$ |
| ssc05031                   | Amphetamine addiction                     | -1.6 | $5 \times 10^{-2}$ |      |                    |      |                    |                    |
| ssc05032                   | Morphine addiction                        |      |                    | -1.8 | $5 \times 10^{-3}$ |      | 1.7                | $3 \times 10^{-2}$ |
| ssc04727                   | GABAergic synapse                         |      |                    | -1.8 | $5 \times 10^{-3}$ |      | 1.7                | $3 \times 10^{-2}$ |
| ssc04110                   | Cell cycle                                |      |                    | -1.8 | $7 \times 10^{-3}$ |      |                    |                    |
| ssc03030                   | DNA replication                           |      |                    | -1.8 | $7 \times 10^{-3}$ |      |                    |                    |
| ssc04114                   | Oocyte meiosis                            |      |                    | -1.8 | $1 \times 10^{-2}$ |      |                    |                    |
| ssc04724                   | Glutamatergic synapse                     |      |                    | -1.8 | $1 \times 10^{-2}$ |      |                    |                    |
| ssc04971                   | Gastric acid secretion                    |      |                    | -1.8 | $1 \times 10^{-2}$ |      |                    |                    |
| ssc00190                   | Oxidative phosphorylation                 |      |                    | -1.8 | $1 \times 10^{-2}$ |      | 2.0                | $2 \times 10^{-3}$ |
| ssc00534                   | Glycosaminoglycan biosynthesis            |      |                    | -1.7 | $1 \times 10^{-2}$ |      |                    |                    |
| ssc03460                   | Fanconi anemia pathway                    |      |                    | -1.7 | $1 \times 10^{-2}$ |      |                    |                    |
| ssc04974                   | Protein digestion and absorption          |      |                    | -1.7 | $2 \times 10^{-2}$ | 2.0  | $2 \times 10^{-3}$ | 2.0                |
| ssc04540                   | Gap junction                              |      |                    | -1.7 | $2 \times 10^{-2}$ |      |                    |                    |
| ssc00500                   | Starch and sucrose metabolism             |      |                    | 2.0  | $2 \times 10^{-2}$ |      |                    |                    |
| ssc03010                   | Ribosome                                  |      |                    | 2.0  | $3 \times 10^{-2}$ | -2.2 | $2 \times 10^{-8}$ | 2.0                |
| ssc03440                   | Homologous recombination                  |      |                    | -1.7 | $4 \times 10^{-2}$ |      |                    | -2.3               |
| ssc04720                   | Long-term potentiation                    |      |                    | -1.7 | $4 \times 10^{-2}$ | -1.7 | $4 \times 10^{-2}$ | -1.8               |
| ssc04660                   | T cell receptor signaling pathway         |      |                    |      |                    | -2.2 | $2 \times 10^{-8}$ |                    |
| ssc04940                   | Type I diabetes mellitus                  |      |                    |      |                    | -2.0 | $2 \times 10^{-4}$ | 1.7                |
| ssc04650                   | Natural killer cell mediated cytotoxicity |      |                    |      |                    | -2.1 | $2 \times 10^{-4}$ |                    |
| ssc05330                   | Allograft rejection                       |      |                    |      |                    | -2.1 | $3 \times 10^{-4}$ | 2.1                |
| ssc05340                   | Primary immunodeficiency                  |      |                    |      |                    | -2.1 | $3 \times 10^{-4}$ |                    |
| ssc05332                   | Graft-versus-host disease                 |      |                    |      |                    | -2.0 | $9 \times 10^{-4}$ | 2.3                |

|          |                                                          |      |                    |     |                    |                    |                    |
|----------|----------------------------------------------------------|------|--------------------|-----|--------------------|--------------------|--------------------|
| ssc05162 | Measles                                                  | -1.8 | $2 \times 10^{-2}$ |     |                    | 1.7                | $2 \times 10^{-2}$ |
| ssc05416 | Viral myocarditis                                        | -1.8 | $2 \times 10^{-2}$ |     |                    | 2.1                | $1 \times 10^{-4}$ |
| ssc04640 | Hematopoietic cell lineage                               | -1.8 | $2 \times 10^{-2}$ |     |                    | 2.0                | $4 \times 10^{-3}$ |
| ssc05320 | Autoimmune thyroid disease                               | -1.8 | $2 \times 10^{-2}$ |     |                    | 2.1                | $1 \times 10^{-4}$ |
| ssc04612 | Antigen processing and presentation                      | -1.8 | $2 \times 10^{-2}$ |     |                    | 2.4                | $2 \times 10^{-8}$ |
| ssc04659 | Th17 cell differentiation                                | -1.7 | $3 \times 10^{-2}$ |     |                    | 2.0                | $3 \times 10^{-3}$ |
| ssc04721 | Synaptic vesicle cycle                                   | -1.7 | $3 \times 10^{-2}$ |     | 1.8                | $2 \times 10^{-2}$ |                    |
| ssc04672 | Intestinal immune network for IgA production             | -1.7 | $4 \times 10^{-2}$ |     |                    | 1.8                | $2 \times 10^{-2}$ |
| ssc04550 | Signaling pathways regulating pluripotency of stem cells | 1.8  | $5 \times 10^{-2}$ |     |                    |                    |                    |
| ssc00340 | Histidine metabolism                                     | 1.8  | $5 \times 10^{-2}$ |     |                    |                    |                    |
| ssc04658 | Th1 and Th2 cell differentiation                         | -1.7 | $5 \times 10^{-2}$ |     |                    | 2.0                | $3 \times 10^{-3}$ |
| ssc05150 | Staphylococcus aureus infection                          |      |                    | 1.8 | $1 \times 10^{-2}$ | 2.5                | $2 \times 10^{-8}$ |
| ssc00100 | Steroid biosynthesis                                     |      |                    | 1.7 | $3 \times 10^{-2}$ | -2.0               | $9 \times 10^{-3}$ |
| ssc05321 | Inflammatory bowel disease (IBD)                         |      |                    |     |                    | 2.2                | $2 \times 10^{-8}$ |
| ssc04610 | Complement and coagulation cascades                      |      |                    |     |                    | 2.2                | $2 \times 10^{-8}$ |
| ssc05144 | Malaria                                                  |      |                    |     |                    | 2.2                | $2 \times 10^{-8}$ |
| ssc05164 | Influenza A                                              |      |                    |     |                    | 2.0                | $3 \times 10^{-3}$ |
| ssc05310 | Asthma                                                   |      |                    |     |                    | 2.0                | $4 \times 10^{-3}$ |
| ssc04621 | NOD-like receptor signaling pathway                      |      |                    |     |                    | 2.0                | $4 \times 10^{-3}$ |
| ssc04512 | ECM-receptor interaction                                 |      |                    |     |                    | 2.0                | $4 \times 10^{-3}$ |
| ssc05133 | Pertussis                                                |      |                    |     |                    | 2.0                | $4 \times 10^{-3}$ |
| ssc04724 | Glutamatergic synapse                                    |      |                    |     |                    | -2.0               | $1 \times 10^{-2}$ |
| ssc00900 | Terpenoid backbone biosynthesis                          |      |                    |     |                    | -2.0               | $1 \times 10^{-2}$ |
| ssc00670 | One carbon pool by folate                                |      |                    |     |                    | -2.0               | $1 \times 10^{-2}$ |
| ssc04911 | Insulin secretion                                        |      |                    |     |                    | -1.8               | $3 \times 10^{-2}$ |
| ssc05323 | Rheumatoid arthritis                                     |      |                    |     |                    | 1.7                | $3 \times 10^{-2}$ |
| ssc04962 | Vasopressin-regulated water reabsorption                 |      |                    |     |                    | -1.8               | $3 \times 10^{-2}$ |
| ssc04725 | Cholinergic synapse                                      |      |                    |     |                    | -1.8               | $3 \times 10^{-2}$ |
| ssc05322 | Systemic lupus erythematosus                             |      |                    |     |                    | 1.7                | $4 \times 10^{-2}$ |
| ssc04620 | Toll-like receptor signaling pathway                     |      |                    |     |                    | 1.7                | $4 \times 10^{-2}$ |
| ssc04933 | AGE-RAGE signaling pathway in diabetic complications     |      |                    |     |                    | 1.7                | $4 \times 10^{-2}$ |

### Over-Representation Analysis (ORA)

[illegible]

---

GO Biological Process<sup>1</sup>

|            |                                                                                             |     |                    |     |                    |                         |
|------------|---------------------------------------------------------------------------------------------|-----|--------------------|-----|--------------------|-------------------------|
| GO:0042391 | regulation of membrane potential                                                            | 4.3 | $7 \times 10^{-6}$ |     |                    |                         |
| GO:0048167 | regulation of synaptic plasticity                                                           | 5.6 | $5 \times 10^{-4}$ |     |                    |                         |
| GO:0016126 | sterol biosynthetic process                                                                 | 7.6 | $1 \times 10^{-3}$ |     | 9.8                | $9 \times 10^{-5}$      |
| GO:0050890 | cognition                                                                                   | 4.4 | $2 \times 10^{-3}$ |     |                    |                         |
| GO:0050804 | modulation of chemical synaptic transmission                                                | 3.5 | $2 \times 10^{-3}$ |     |                    |                         |
| GO:0099177 | regulation of trans-synaptic signaling                                                      | 3.5 | $2 \times 10^{-3}$ |     |                    |                         |
| GO:1901617 | organic hydroxy compound biosynthetic process                                               | 3.8 | $2 \times 10^{-3}$ |     | 4.0                | $4 \times 10^{-3}$      |
| GO:0051480 | regulation of cytosolic calcium ion concentration                                           | 3.4 | $2 \times 10^{-3}$ | 3.8 | $5 \times 10^{-2}$ |                         |
| GO:0001505 | regulation of neurotransmitter levels                                                       | 3.3 | $3 \times 10^{-3}$ |     | 3.8                | $1 \times 10^{-3}$      |
|            |                                                                                             |     |                    |     |                    | 5.0 $1 \times 10^{-2}$  |
| GO:0060078 | regulation of postsynaptic membrane potential                                               | 6.1 | $3 \times 10^{-3}$ |     |                    |                         |
| GO:0016125 | sterol metabolic process                                                                    | 4.6 | $6 \times 10^{-3}$ |     | 6.0                | $7 \times 10^{-4}$      |
| GO:0010001 | glial cell differentiation                                                                  | 3.9 | $7 \times 10^{-3}$ |     | 4.0                | $2 \times 10^{-2}$      |
|            |                                                                                             |     |                    |     |                    | 6.2 $8 \times 10^{-3}$  |
| GO:0048709 | oligodendrocyte differentiation                                                             | 6.2 | $8 \times 10^{-3}$ |     | 8.0                | $1 \times 10^{-3}$      |
|            |                                                                                             |     |                    |     |                    | 12.5 $2 \times 10^{-3}$ |
| GO:0060041 | retina development in camera-type eye                                                       | 5.1 | $1 \times 10^{-2}$ |     |                    |                         |
| GO:0007611 | learning or memory                                                                          | 4.1 | $1 \times 10^{-2}$ |     |                    |                         |
| GO:0061564 | axon development                                                                            | 2.8 | $1 \times 10^{-2}$ |     |                    |                         |
| GO:0006937 | regulation of muscle contraction                                                            | 4.3 | $2 \times 10^{-2}$ |     |                    |                         |
| GO:0006694 | steroid biosynthetic process                                                                | 3.9 | $2 \times 10^{-2}$ |     |                    |                         |
| GO:0035637 | multicellular organismal signaling                                                          | 4.6 | $2 \times 10^{-2}$ |     |                    |                         |
|            | G protein-coupled receptor signaling pathway, coupled to cyclic nucleotide second messenger |     |                    |     |                    |                         |
| GO:0007187 |                                                                                             | 3.0 | $2 \times 10^{-2}$ | 4.1 | $3 \times 10^{-2}$ |                         |
| GO:0007204 | positive regulation of cytosolic calcium ion concentration                                  | 3.1 | $3 \times 10^{-2}$ |     |                    |                         |
| GO:0003013 | circulatory system process                                                                  | 2.7 | $3 \times 10^{-2}$ |     |                    |                         |
| GO:0008203 | cholesterol metabolic process                                                               | 4.4 | $3 \times 10^{-2}$ |     | 5.7                | $4 \times 10^{-3}$      |
| GO:1902652 | secondary alcohol metabolic process                                                         | 4.4 | $3 \times 10^{-2}$ |     | 5.7                | $4 \times 10^{-3}$      |
| GO:0060291 | long-term synaptic potentiation                                                             | 6.6 | $3 \times 10^{-2}$ |     |                    |                         |
| GO:0006695 | cholesterol biosynthetic process                                                            | 6.6 | $3 \times 10^{-2}$ |     | 8.6                | $6 \times 10^{-3}$      |
| GO:1902653 | secondary alcohol biosynthetic process                                                      | 6.6 | $3 \times 10^{-2}$ |     | 8.6                | $6 \times 10^{-3}$      |
| GO:0010524 | positive regulation of calcium ion transport into cytosol                                   | 6.6 | $3 \times 10^{-2}$ |     | 8.6                | $6 \times 10^{-3}$      |
| GO:0006836 | neurotransmitter transport                                                                  | 3.2 | $3 \times 10^{-2}$ |     | 4.1                | $3 \times 10^{-3}$      |
|            |                                                                                             |     |                    |     |                    | 5.1 $2 \times 10^{-2}$  |
| GO:0007628 | adult walking behavior                                                                      | 8.0 | $3 \times 10^{-2}$ |     |                    |                         |
| GO:0019933 | cAMP-mediated signaling                                                                     | 3.3 | $3 \times 10^{-2}$ | 5.1 | $2 \times 10^{-2}$ | 3.6 $3 \times 10^{-2}$  |

|            |                                                                           |     |                    |      |                    |                        |                         |
|------------|---------------------------------------------------------------------------|-----|--------------------|------|--------------------|------------------------|-------------------------|
| GO:0007189 | adenylate cyclase-activating G protein-coupled receptor signaling pathway | 3.5 | $3 \times 10^{-2}$ | 5.4  | $3 \times 10^{-2}$ |                        |                         |
| GO:0046456 | icosanoid biosynthetic process                                            | 6.2 | $3 \times 10^{-2}$ |      |                    |                        |                         |
| GO:0060079 | excitatory postsynaptic potential                                         | 6.2 | $3 \times 10^{-2}$ |      |                    |                        |                         |
| GO:0046165 | alcohol biosynthetic process                                              | 3.8 | $3 \times 10^{-2}$ |      |                    |                        |                         |
| GO:0007272 | ensheathment of neurons                                                   | 4.6 | $3 \times 10^{-2}$ |      | 6.7                | $2 \times 10^{-3}$     | 9.3 $7 \times 10^{-3}$  |
| GO:0008366 | axon ensheathment                                                         | 4.6 | $3 \times 10^{-2}$ |      | 6.7                | $2 \times 10^{-3}$     | 9.3 $7 \times 10^{-3}$  |
| GO:0008015 | blood circulation                                                         | 2.6 | $3 \times 10^{-2}$ |      |                    |                        |                         |
| GO:0043547 | positive regulation of GTPase activity                                    | 2.8 | $5 \times 10^{-2}$ |      | 3.4                | $3 \times 10^{-2}$     |                         |
| GO:0030534 | adult behavior                                                            | 4.1 | $3 \times 10^{-2}$ |      |                    |                        |                         |
| GO:0006942 | regulation of striated muscle contraction                                 | 5.2 | $3 \times 10^{-2}$ |      |                    |                        |                         |
| GO:0071805 | potassium ion transmembrane transport                                     | 3.4 | $3 \times 10^{-2}$ |      |                    |                        |                         |
| GO:1990573 | potassium ion import across plasma membrane                               | 7.4 | $3 \times 10^{-2}$ |      |                    |                        |                         |
| GO:0008299 | isoprenoid biosynthetic process                                           | 7.4 | $3 \times 10^{-2}$ |      | 9.5                | $1 \times 10^{-2}$     |                         |
| GO:0071804 | cellular potassium ion transport                                          | 3.4 | $3 \times 10^{-2}$ |      |                    |                        |                         |
| GO:0050900 | leukocyte migration                                                       | 2.7 | $4 \times 10^{-2}$ |      | 4.6                | $3 \times 10^{-5}$     |                         |
| GO:0007409 | axonogenesis                                                              | 2.7 | $4 \times 10^{-2}$ |      |                    |                        |                         |
| GO:0008344 | adult locomotory behavior                                                 | 4.8 | $4 \times 10^{-2}$ |      |                    |                        |                         |
| GO:0098656 | anion transmembrane transport                                             | 3.2 | $5 \times 10^{-2}$ |      |                    |                        | 6.0 $1 \times 10^{-2}$  |
| GO:0051208 | sequestering of calcium ion                                               | 4.3 | $5 \times 10^{-2}$ |      | 5.5                | $2 \times 10^{-2}$     |                         |
| GO:0019935 | cyclic-nucleotide-mediated signaling                                      |     |                    | 5.1  | $2 \times 10^{-2}$ |                        |                         |
| GO:0043062 | extracellular structure organization                                      |     |                    | 4.8  | $2 \times 10^{-2}$ | 4.0 $4 \times 10^{-3}$ |                         |
| GO:0033077 | T cell differentiation in thymus                                          |     |                    | 9.8  | $2 \times 10^{-2}$ |                        |                         |
| GO:0007188 | adenylate cyclase-modulating G protein-coupled receptor signaling pathway |     |                    | 4.6  | $2 \times 10^{-2}$ |                        |                         |
| GO:0006898 | receptor-mediated endocytosis                                             |     |                    | 4.7  | $3 \times 10^{-2}$ |                        |                         |
| GO:0006855 | drug transmembrane transport                                              |     |                    | 8.6  | $3 \times 10^{-2}$ |                        | 12.5 $2 \times 10^{-3}$ |
| GO:0030199 | collagen fibril organization                                              |     |                    | 11.0 | $3 \times 10^{-2}$ |                        |                         |
| GO:0030198 | extracellular matrix organization                                         |     |                    | 5.0  | $3 \times 10^{-2}$ | 4.0 $2 \times 10^{-2}$ |                         |
| GO:0060326 | cell chemotaxis                                                           |     |                    |      | 4.2                | $7 \times 10^{-5}$     |                         |
| GO:0097529 | myeloid leukocyte migration                                               |     |                    |      | 5.8                | $9 \times 10^{-5}$     |                         |
| GO:0071674 | mononuclear cell migration                                                |     |                    |      | 9.8                | $9 \times 10^{-5}$     |                         |
| GO:0030595 | leukocyte chemotaxis                                                      |     |                    |      | 4.8                | $2 \times 10^{-4}$     |                         |
| GO:0002548 | monocyte chemotaxis                                                       |     |                    |      | 11.5               | $5 \times 10^{-4}$     |                         |
| GO:0071346 | cellular response to interferon-gamma                                     |     |                    |      | 6.9                | $1 \times 10^{-3}$     |                         |
| GO:0002685 | regulation of leukocyte migration                                         |     |                    |      | 4.8                | $2 \times 10^{-3}$     |                         |

|            |                                                                        |      |                    |                         |
|------------|------------------------------------------------------------------------|------|--------------------|-------------------------|
| GO:0034341 | response to interferon-gamma                                           | 6.1  | $3 \times 10^{-3}$ |                         |
| GO:0071621 | granulocyte chemotaxis                                                 | 5.7  | $4 \times 10^{-3}$ |                         |
| GO:0030593 | neutrophil chemotaxis                                                  | 6.5  | $4 \times 10^{-3}$ |                         |
| GO:0042552 | myelination                                                            | 6.3  | $5 \times 10^{-3}$ | 8.5 $2 \times 10^{-2}$  |
| GO:0071675 | regulation of mononuclear cell migration                               | 9.2  | $5 \times 10^{-3}$ |                         |
| GO:0002688 | regulation of leukocyte chemotaxis                                     | 5.3  | $6 \times 10^{-3}$ |                         |
| GO:0097530 | granulocyte migration                                                  | 5.3  | $6 \times 10^{-3}$ |                         |
| GO:1990266 | neutrophil migration                                                   | 6.0  | $6 \times 10^{-3}$ |                         |
| GO:0051928 | positive regulation of calcium ion transport                           | 6.0  | $6 \times 10^{-3}$ |                         |
| GO:0006837 | serotonin transport                                                    | 15.3 | $7 \times 10^{-3}$ |                         |
| GO:0006835 | dicarboxylic acid transport                                            | 7.6  | $1 \times 10^{-2}$ | 12.0 $2 \times 10^{-2}$ |
| GO:0070098 | chemokine-mediated signaling pathway                                   | 5.4  | $1 \times 10^{-2}$ |                         |
| GO:0006720 | isoprenoid metabolic process                                           | 6.2  | $1 \times 10^{-2}$ |                         |
| GO:0051281 | positive regulation of release of sequestered calcium ion into cytosol | 9.5  | $1 \times 10^{-2}$ |                         |
| GO:0035587 | purinergic receptor signaling pathway                                  | 9.5  | $1 \times 10^{-2}$ |                         |
| GO:1990868 | response to chemokine                                                  | 5.1  | $1 \times 10^{-2}$ |                         |
| GO:1990869 | cellular response to chemokine                                         | 5.1  | $1 \times 10^{-2}$ |                         |
| GO:0090026 | positive regulation of monocyte chemotaxis                             | 11.5 | $2 \times 10^{-2}$ |                         |
| GO:0014065 | phosphatidylinositol 3-kinase signaling                                | 4.7  | $2 \times 10^{-2}$ |                         |
| GO:0046942 | carboxylic acid transport                                              | 3.2  | $4 \times 10^{-2}$ |                         |
| GO:0035588 | G protein-coupled purinergic receptor signaling pathway                | 9.2  | $4 \times 10^{-2}$ |                         |
| GO:0015711 | organic anion transport                                                | 2.7  | $4 \times 10^{-2}$ |                         |
| GO:0072677 | eosinophil migration                                                   | 13.7 | $4 \times 10^{-2}$ |                         |
| GO:0031272 | regulation of pseudopodium assembly                                    | 13.7 | $4 \times 10^{-2}$ |                         |
| GO:0070167 | regulation of biomineral tissue development                            | 4.5  | $4 \times 10^{-2}$ |                         |
| GO:0015893 | drug transport                                                         |      |                    | 6.4 $4 \times 10^{-3}$  |
| GO:1902475 | L-alpha-amino acid transmembrane transport                             |      |                    | 14.6 $9 \times 10^{-3}$ |
| GO:0015807 | L-amino acid transport                                                 |      |                    | 13.7 $1 \times 10^{-2}$ |
| GO:0015813 | L-glutamate transmembrane transport                                    |      |                    | 20.9 $1 \times 10^{-2}$ |
| GO:0006721 | terpenoid metabolic process                                            |      |                    | 11.4 $2 \times 10^{-2}$ |
| GO:1903825 | organic acid transmembrane transport                                   |      |                    | 8.0 $2 \times 10^{-2}$  |
| GO:1905039 | carboxylic acid transmembrane transport                                |      |                    | 8.0 $2 \times 10^{-2}$  |

|                            |                                                           |     |                    |      |                    |     |                    |      |                    |      |                    |      |                    |
|----------------------------|-----------------------------------------------------------|-----|--------------------|------|--------------------|-----|--------------------|------|--------------------|------|--------------------|------|--------------------|
| GO:0003333                 | amino acid transmembrane transport                        |     |                    |      |                    |     |                    |      |                    |      |                    | 10.2 | $2 \times 10^{-2}$ |
| GO:0042063                 | gliogenesis                                               |     |                    |      |                    |     |                    |      |                    |      |                    | 4.8  | $2 \times 10^{-2}$ |
| GO:0015800                 | acidic amino acid transport                               |     |                    |      |                    |     |                    |      |                    |      |                    | 13.7 | $3 \times 10^{-2}$ |
| KEGG Pathways <sup>2</sup> |                                                           |     |                    |      |                    |     |                    |      |                    |      |                    |      |                    |
| ssc04724                   | Glutamatergic synapse                                     | 5.0 | $1 \times 10^{-8}$ | 3.4  | $3 \times 10^{-2}$ | 4.4 | $3 \times 10^{-4}$ | 3.0  | $1 \times 10^{-2}$ |      |                    | 5.3  | $6 \times 10^{-4}$ |
| ssc05033                   | Nicotine addiction                                        | 7.8 | $9 \times 10^{-8}$ | 13.5 | $6 \times 10^{-8}$ | 7.8 | $3 \times 10^{-4}$ |      |                    | 21.1 | $3 \times 10^{-5}$ | 11.1 | $1 \times 10^{-4}$ |
| ssc04727                   | GABAergic synapse                                         | 5.1 | $9 \times 10^{-8}$ | 5.0  | $3 \times 10^{-3}$ |     |                    |      |                    | 12.7 | $3 \times 10^{-5}$ | 5.6  | $2 \times 10^{-3}$ |
| ssc04713                   | Circadian entrainment                                     | 4.1 | $2 \times 10^{-5}$ | 4.0  | $2 \times 10^{-2}$ | 3.2 | $4 \times 10^{-2}$ |      |                    |      |                    |      |                    |
| ssc04540                   | Gap junction                                              | 4.2 | $2 \times 10^{-5}$ | 4.0  | $3 \times 10^{-2}$ | 3.9 | $7 \times 10^{-3}$ | 4.1  | $5 \times 10^{-4}$ |      |                    |      |                    |
| ssc04971                   | Gastric acid secretion                                    | 4.4 | $3 \times 10^{-5}$ |      |                    | 3.6 | $3 \times 10^{-2}$ | 3.5  | $1 \times 10^{-2}$ |      |                    |      |                    |
| ssc04725                   | Cholinergic synapse                                       | 3.6 | $3 \times 10^{-5}$ | 3.3  | $4 \times 10^{-2}$ | 3.3 | $1 \times 10^{-2}$ | 2.7  | $2 \times 10^{-2}$ |      |                    |      |                    |
| ssc00100                   | Steroid biosynthesis                                      | 8.9 | $3 \times 10^{-5}$ |      |                    |     |                    | 10.6 | $4 \times 10^{-5}$ |      |                    |      |                    |
| ssc05031                   | Amphetamine addiction                                     | 4.6 | $3 \times 10^{-5}$ | 6.6  | $5 \times 10^{-4}$ | 5.8 | $3 \times 10^{-4}$ |      |                    |      |                    | 7.4  | $4 \times 10^{-4}$ |
| ssc05032                   | Morphine addiction                                        | 3.8 | $9 \times 10^{-5}$ | 4.7  | $4 \times 10^{-3}$ |     |                    |      |                    | 11.9 | $3 \times 10^{-5}$ |      |                    |
| ssc05030                   | Cocaine addiction                                         | 5.0 | $2 \times 10^{-4}$ | 8.0  | $5 \times 10^{-4}$ | 4.7 | $2 \times 10^{-2}$ |      |                    |      |                    | 6.7  | $1 \times 10^{-2}$ |
| ssc04726                   | Serotonergic synapse                                      | 3.1 | $1 \times 10^{-3}$ |      |                    |     |                    |      |                    |      |                    |      |                    |
| ssc03320                   | PPAR signaling pathway                                    | 3.6 | $2 \times 10^{-3}$ |      |                    |     |                    |      |                    |      |                    |      |                    |
| ssc04970                   | Salivary secretion                                        | 3.4 | $3 \times 10^{-3}$ |      |                    | 3.5 | $4 \times 10^{-2}$ |      |                    |      |                    |      |                    |
| ssc04976                   | Bile secretion                                            | 3.4 | $5 \times 10^{-3}$ |      |                    |     |                    |      |                    |      |                    |      |                    |
| ssc00900                   | Terpenoid backbone biosynthesis                           | 6.1 | $5 \times 10^{-3}$ |      |                    |     |                    | 7.2  | $4 \times 10^{-3}$ |      |                    |      |                    |
| ssc04918                   | Thyroid hormone synthesis                                 | 3.3 | $6 \times 10^{-3}$ |      |                    | 4.7 | $2 \times 10^{-3}$ | 3.9  | $4 \times 10^{-3}$ |      |                    | 5.2  | $1 \times 10^{-2}$ |
| ssc04961                   | Endocrine and other factor-regulated calcium reabsorption | 4.0 | $9 \times 10^{-3}$ |      |                    |     |                    |      |                    |      |                    |      |                    |
| ssc04720                   | Long-term potentiation                                    | 3.3 | $1 \times 10^{-2}$ |      |                    | 4.0 | $2 \times 10^{-2}$ |      |                    |      |                    |      |                    |
| ssc04913                   | Ovarian steroidogenesis                                   | 3.6 | $2 \times 10^{-2}$ |      |                    |     |                    | 4.3  | $1 \times 10^{-2}$ |      |                    | 5.6  | $5 \times 10^{-2}$ |
| ssc04911                   | Insulin secretion                                         | 2.8 | $2 \times 10^{-2}$ |      |                    | 4.5 | $2 \times 10^{-3}$ |      |                    |      |                    |      |                    |
| ssc04670                   | Leukocyte transendothelial migration                      | 2.5 | $2 \times 10^{-2}$ |      |                    |     |                    | 2.7  | $2 \times 10^{-2}$ |      |                    |      |                    |
| ssc04916                   | Melanogenesis                                             | 2.6 | $2 \times 10^{-2}$ | 4.3  | $8 \times 10^{-3}$ | 3.4 | $2 \times 10^{-2}$ |      |                    |      |                    |      |                    |
| ssc00590                   | Arachidonic acid metabolism                               | 3.1 | $2 \times 10^{-2}$ |      |                    |     |                    | 3.2  | $3 \times 10^{-2}$ |      |                    |      |                    |
| ssc04640                   | Hematopoietic cell lineage                                | 2.7 | $3 \times 10^{-2}$ |      |                    | 4.6 | $7 \times 10^{-4}$ | 4.0  | $5 \times 10^{-4}$ |      |                    |      |                    |
| ssc04925                   | Aldosterone synthesis and secretion                       | 2.6 | $3 \times 10^{-2}$ |      |                    | 3.7 | $1 \times 10^{-2}$ |      |                    |      |                    | 4.0  | $5 \times 10^{-2}$ |
| ssc04666                   | Fc gamma R-mediated phagocytosis                          | 2.6 | $4 \times 10^{-2}$ |      |                    |     |                    | 3.1  | $2 \times 10^{-2}$ |      |                    |      |                    |
| ssc00910                   | Nitrogen metabolism                                       | 5.3 | $5 \times 10^{-2}$ |      |                    |     |                    |      |                    |      |                    |      |                    |
| ssc04512                   | ECM-receptor interaction                                  |     |                    | 5.8  | $5 \times 10^{-4}$ | 5.1 | $3 \times 10^{-4}$ |      |                    |      |                    |      |                    |
| ssc04974                   | Protein digestion and absorption                          |     |                    | 5.4  | $7 \times 10^{-4}$ | 5.6 | $1 \times 10^{-4}$ |      |                    |      |                    |      |                    |
| ssc05217                   | Basal cell carcinoma                                      |     |                    | 5.2  | $1 \times 10^{-2}$ |     |                    |      |                    |      |                    |      |                    |
| ssc05412                   | Arrhythmogenic right ventricular cardiomyopathy (ARVC)    |     |                    | 5.0  | $1 \times 10^{-2}$ |     |                    |      |                    |      |                    |      |                    |

|          |                                                      |     |                    |     |                    |     |                    |      |                        |
|----------|------------------------------------------------------|-----|--------------------|-----|--------------------|-----|--------------------|------|------------------------|
| ssc03030 | DNA replication                                      | 6.7 | $2 \times 10^{-2}$ |     |                    |     |                    |      |                        |
| ssc04110 | Cell cycle                                           | 3.5 | $2 \times 10^{-2}$ |     |                    |     |                    |      |                        |
| ssc00534 | Glycosaminoglycan biosynthesis                       | 7.8 | $3 \times 10^{-2}$ |     |                    |     |                    | 16.7 | $4 \times 10^{-2}$     |
| ssc05204 | Chemical carcinogenesis                              | 4.6 | $3 \times 10^{-2}$ |     |                    |     |                    | 11.0 | $5 \times 10^{-3}$     |
| ssc04721 | Synaptic vesicle cycle                               |     |                    | 6.1 | $3 \times 10^{-4}$ | 3.3 | $3 \times 10^{-2}$ |      | 6.0 $7 \times 10^{-3}$ |
| ssc05146 | Amoebiasis                                           |     |                    | 4.8 | $3 \times 10^{-4}$ |     |                    |      |                        |
| ssc05340 | Primary immunodeficiency                             |     |                    | 7.6 | $8 \times 10^{-4}$ |     |                    |      |                        |
| ssc05320 | Autoimmune thyroid disease                           |     |                    | 6.3 | $8 \times 10^{-4}$ |     |                    |      |                        |
| ssc04933 | AGE-RAGE signaling pathway in diabetic complications |     |                    | 3.7 | $6 \times 10^{-3}$ |     |                    |      |                        |
| ssc05142 | Chagas disease (American trypanosomiasis)            |     |                    | 3.6 | $7 \times 10^{-3}$ |     |                    |      |                        |
| ssc04660 | T cell receptor signaling pathway                    |     |                    | 3.3 | $2 \times 10^{-2}$ |     |                    |      |                        |
| ssc05143 | African trypanosomiasis                              |     |                    | 5.6 | $2 \times 10^{-2}$ | 4.6 | $2 \times 10^{-2}$ |      |                        |
| ssc05330 | Allograft rejection                                  |     |                    | 4.9 | $3 \times 10^{-2}$ |     |                    |      |                        |
| ssc04612 | Antigen processing and presentation                  |     |                    | 3.8 | $5 \times 10^{-2}$ |     |                    |      |                        |
| ssc04650 | Natural killer cell mediated cytotoxicity            |     |                    | 3.0 | $5 \times 10^{-2}$ |     |                    |      |                        |
| ssc04610 | Complement and coagulation cascades                  |     |                    | 3.2 | $5 \times 10^{-2}$ | 3.1 | $2 \times 10^{-2}$ |      |                        |
| ssc05150 | Staphylococcus aureus infection                      |     |                    |     |                    | 7.1 | $4 \times 10^{-6}$ |      |                        |
| ssc04611 | Platelet activation                                  |     |                    |     |                    | 3.3 | $1 \times 10^{-3}$ |      |                        |
| ssc04064 | NF-kappa B signaling pathway                         |     |                    |     |                    | 3.3 | $8 \times 10^{-3}$ |      |                        |
| ssc04625 | C-type lectin receptor signaling pathway             |     |                    |     |                    | 3.0 | $1 \times 10^{-2}$ |      |                        |
| ssc04923 | Regulation of lipolysis in adipocytes                |     |                    |     |                    | 3.7 | $2 \times 10^{-2}$ |      |                        |
| ssc00565 | Ether lipid metabolism                               |     |                    |     |                    | 4.0 | $2 \times 10^{-2}$ |      |                        |
| ssc05133 | Pertussis                                            |     |                    |     |                    | 3.1 | $3 \times 10^{-2}$ |      |                        |
| ssc05144 | Malaria                                              |     |                    |     |                    | 3.7 | $3 \times 10^{-2}$ |      |                        |
| ssc04380 | Osteoclast differentiation                           |     |                    |     |                    | 2.4 | $4 \times 10^{-2}$ |      |                        |
| ssc01040 | Biosynthesis of unsaturated fatty acids              |     |                    |     |                    | 4.5 | $4 \times 10^{-2}$ |      |                        |
| ssc00650 | Butanoate metabolism                                 |     |                    |     |                    |     |                    | 8.8  | $3 \times 10^{-2}$     |

<sup>1</sup> Gene Ontology.

<sup>2</sup> KEGG = Kyoto Encyclopedia of Genes and Genomes pathway.

<sup>3</sup> NES > 0 (NES < 0) denotes gene over-expression (under-expression) in control relative to MIA-exposed pigs, pigs exposed to weaning stress relative to not stressed (nursed), and males relative to females.



**Supplemental Table S3.** Log<sub>2</sub>(fold change) of the genes in the ensheathment of neurons Kyoto Encyclopedia of Genes and Genomes pathway for the 12 pairwise contrasts between groups characterized by the maternal immune activation, weaning and sex level.

| Gene Symbol    | A     | B     | C     | D     | E     | F     | G     | H     | I     | J     | K     | L     |
|----------------|-------|-------|-------|-------|-------|-------|-------|-------|-------|-------|-------|-------|
| <i>Cldn11</i>  | 0.32  | -0.21 | 0.01  | -0.18 | 0.3   | -0.42 | 0.63  | -0.11 | -0.25 | 0.54  | -0.28 | -0.29 |
| <i>Olig2</i>   | 0.49  | 0.25  | 0.85  | -0.59 | -0.2  | -0.25 | -0.03 | -0.83 | -0.59 | -1.31 | -0.61 | 0.23  |
| <i>Mal</i>     | 1.53  | 0.96  | -0.85 | -1.7  | -0.39 | -0.58 | 1.11  | -1.5  | -1.46 | 2.15  | -1.66 | 0.98  |
| <i>Plp1</i>    | 1.58  | 0.51  | -0.55 | -1.47 | 0.76  | -0.83 | 0.35  | -1.42 | -1.74 | 0.48  | -1.62 | 0.38  |
| <i>Id4</i>     | -1.05 | -0.66 | -0.47 | 1.11  | -1.19 | 0.17  | -1.3  | 1.12  | 1.00  | -0.26 | 0.94  | -0.8  |
| <i>Ctnnb1</i>  | -1.05 | -0.81 | 0.7   | 1.16  | 0.07  | 0.24  | 0.12  | 1.12  | 1.11  | -0.97 | 1.09  | -0.85 |
| <i>Mpp5</i>    | -0.94 | -0.8  | 0.81  | 1.11  | 0.28  | 0.19  | 0.02  | 1.03  | 1.02  | -1.00 | 1.05  | -0.83 |
| <i>Cd9</i>     | -0.85 | -0.85 | 0.9   | 0.93  | 0.56  | 0.1   | 0.53  | 0.89  | 1.00  | -0.7  | 1.01  | -0.76 |
| <i>Sox10</i>   | 0.82  | 0.23  | -0.12 | -0.96 | -0.51 | -0.61 | 0.72  | -0.91 | -0.76 | 0.9   | -0.94 | 0.24  |
| <i>Gal3st1</i> | 0.37  | -0.49 | 0.6   | -0.16 | 1.28  | -0.56 | 0.3   | -0.26 | -0.22 | 0.28  | -0.02 | -0.34 |
| <i>Jam3</i>    | -0.55 | -0.7  | -0.29 | 0.63  | 0.18  | -0.09 | 0.42  | 0.81  | 0.69  | 0.89  | 0.65  | -0.65 |
| <i>Mpz</i>     | -1.25 | 2.73  | -2.58 | 0.57  | -2.41 | 3.11  | -2.73 | 0.78  | 0.81  | -0.04 | 0.73  | 2.75  |
| <i>Kcnj10</i>  | 0.59  | -0.17 | 0.98  | -0.45 | 1.28  | -0.47 | -0.16 | -0.72 | -0.6  | -0.98 | -0.33 | -0.05 |

A = Ma.Nu.Mi vs Ma.Nu.Co; B = Ma.We.Mi vs Ma.We.Co; C = Fe.Nu.Mi vs Fe.Nu.Co; D = Fe.We.Mi vs Fe.We.Co; E = Ma.We.Co vs Ma.Nu.Co; F = Ma.We.Mi vs Ma.Nu.Mi; G = Fe.We.Co vs Fe.Nu.Co; H = Fe.We.Mi vs Fe.Nu.Mi; I = Ma.Nu.Co vs Fe.Nu.Co; J = Ma.Nu.Mi vs Fe.Nu.Mi; K = Ma.We.Co vs Fe.We.Co; L = Ma.We.Mi vs Fe.We.Mi.

Mi = maternal immune activation, Co = control, We = weaned, Nu = nursed, Ma = male, Fe = female.
